# Supplementary material for: Continuous Hypoxic Culturing of Human Embryonic Stem Cells Enhances SSEA-3 and MYC Levels
Source: PLoS One. 2013 Nov 13;8(11):e78847. doi: 10.1371/journal.pone.0078847 (PMC3827269; doi:10.1371/journal.pone.0078847)
Supplement: Table S1 — Significant gene expression changes of hESC lines cultured in (21%) or (4%) oxygen for 2 h, 24 h or 7 days. Affymetrix GeneChip Human Exon 1.0 ST Arrays. (XLSX) [file pone.0078847.s002.xlsx]

## Sheet: 2h upregulated
ID	mean_H_2h	mean_N_2h	sd_H_2h	sd_N_2h	FC	logFC	P.Value	symbol	Description	Gene	Chromosome	Chromosome.Location	Cytoband	GenBank	UniGene	PubMed	Gene.Ontology	Pathway
80853_at	155	94	53	29	1.617	0.693	0.0018693	JHDM1D	jumonji C domain containing histone demethylase 1 homolog D (S. cerevisiae)	80853	7	-139431014	7q34	NA	Hs.308710	11214970, 12477932, 14702039	GO:0005515: protein binding, GO:0008270: zinc ion binding, GO:0046872: metal ion binding
677830_at	287	175	62	30	1.632	0.707	0.00533182	SNORA50	small nucleolar RNA, H/ACA box 50	677830	16	-57151200	16q21	NA	Hs.677515	15199136, 16381836
148523_at	146	79	89	11	1.662	0.733	0.00410114	C1orf51	chromosome 1 open reading frame 51	148523	1	148521852	1q21.2	NA	Hs.54680	12477932, 14702039, 15489334, 16710414
259290_at	68	40	12	1	1.678	0.747	0.00844096	TAS2R44	taste receptor, type 2, member 44	259290	12	-11074252	12p13.2	NA	Hs.688197	11696554, 12139982, 12379855, 12477932, 12581520, 12584440, 15337684, 15489334, 15496549, 15537898, 17702579	GO:0004872: receptor activity, GO:0004930: G-protein coupled receptor activity, GO:0007165: signal transduction, GO:0007186: G-protein coupled receptor protein signaling pathway, GO:0016020: membrane, GO:0016021: integral to membrane, GO:0050896: response to stimulus, GO:0050909: sensory perception of taste	04742: Taste transduction
353322_at	222	131	51	27	1.682	0.75	0.00249081	ANKRD37	ankyrin repeat domain 37	353322	4	186554833	4q35.1	NA	Hs.508154	12477932, 15489334, 15809689	GO:0005634: nucleus, GO:0005737: cytoplasm
728987_at	68	40	28	17	1.705	0.77	0.00419142	LOC728987	hypothetical LOC728987	728987	1		1q42.2	NA	Hs.683991
729793_at	127	69	59	6	1.713	0.777	0.00280662	LOC729793	similar to peptidyl-Pro cis trans isomerase	729793	11		11p11.2	NA
3099_at	1065	578	365	79	1.774	0.827	0.000272262	HK2	hexokinase 2	3099	2	74913289	2p13	NA	Hs.406266, Hs.591588	7518342, 7622509, 7883120, 7883122, 7883123, 8250948, 8307259, 8567628, 8786021, 8889548, 9056853, 9278438, 9447955, 11068878, 11688991, 12477932, 12663490, 14672622, 14747281, 15489334, 15710218, 15967114, 16189514, 16396496, 16551620, 16713569, 17785433, 18271924, 18535403, 18772588	GO:0000166: nucleotide binding, GO:0004396: hexokinase activity, GO:0004396: hexokinase activity, GO:0005524: ATP binding, GO:0005739: mitochondrion, GO:0005741: mitochondrial outer membrane, GO:0005829: cytosol, GO:0006006: glucose metabolic process, GO:0006096: glycolysis, GO:0007595: lactation, GO:0016020: membrane, GO:0016301: kinase activity, GO:0016740: transferase activity, GO:0046835: car…	00010: Glycolysis / Gluconeogenesis, 00051: Fructose and mannose metabolism, 00052: Galactose metabolism, 00500: Starch and sucrose metabolism, 00530: Aminosugars metabolism
5210_at	577	317	181	73	1.786	0.837	0.00349081	PFKFB4	6-phosphofructo-2-kinase/fructose-2,6-biphosphatase 4	5210	3	-48530120	3p22-p21	NA	Hs.476217	8830046, 10095107, 12477932, 15474002, 15489334, 15642344, 15925437, 17143338	GO:0000166: nucleotide binding, GO:0003873: 6-phosphofructo-2-kinase activity, GO:0003873: 6-phosphofructo-2-kinase activity, GO:0004331: fructose-2,6-bisphosphate 2-phosphatase activity, GO:0005524: ATP binding, GO:0005829: cytosol, GO:0008152: metabolic process, GO:0016301: kinase activity, GO:0016740: transferase activity, GO:0016787: hydrolase activity	00051: Fructose and mannose metabolism
79365_at	242	127	85	16	1.828	0.87	0.00461717	BHLHE41	basic helix-loop-helix family, member e41	79365	12	-26164227	12p11.23-p12.1	NA	Hs.177841	11058868, 11162494, 11278948, 12354771, 12397359, 12477932, 12624110, 12657651, 16287852, 17194498, 18223678, 18228528, 18345027, 18411297, 18557763	GO:0008283: cell proliferation, GO:0009887: organ morphogenesis, GO:0030154: cell differentiation	04710: Circadian rhythm
5163_at	676	340	449	181	1.923	0.943	0.0030195	PDK1	pyruvate dehydrogenase kinase, isozyme 1	5163	2	173129024	2q31.1	NA	Hs.470633	7499431, 7864652, 9445476, 9512493, 9707564, 9748166, 10357815, 10480933, 10567431, 10748151, 10753910, 10896934, 10995762, 11222751, 11278835, 11313365, 11485553, 11486000, 11733037, 11781095, 11889038, 11978179, 12150926, 12177059, 12374740, 12477932, 12573248, 12676647, 14500673, 14702039, 14718574, 14966024, 15489334, 15591305, 15678105, 16251192, 16344560, 16517405, 16737971, 17327236, 17683…	GO:0000155: two-component sensor activity, GO:0004740: pyruvate dehydrogenase (acetyl-transferring) kinase activity, GO:0005524: ATP binding, GO:0005739: mitochondrion, GO:0005759: mitochondrial matrix, GO:0005975: carbohydrate metabolic process, GO:0006006: glucose metabolic process, GO:0007165: signal transduction, GO:0007264: small GTPase mediated signal transduction, GO:0016740: transferase a…	04660: T cell receptor signaling pathway, 04664: Fc epsilon RI signaling pathway
55818_at	445	207	204	40	2.028	1.02	0.00104295	JMJD1A	jumonji domain containing 1A	55818	2	86521864	2p11.2	NA	Hs.557425	9872452, 12477932, 14702039, 15302935, 15489334, 15815621, 16603237, 18538129, 18713068	GO:0005506: iron ion binding, GO:0005634: nucleus, GO:0006355: regulation of transcription, DNA-dependent, GO:0008270: zinc ion binding, GO:0009755: hormone-mediated signaling, GO:0016491: oxidoreductase activity, GO:0016568: chromatin modification, GO:0016702: oxidoreductase activity, acting on single donors with incorporation of molecular oxygen, incorporation of two atoms of oxygen, GO:0030521…
5209_at	937	412	431	29	2.099	1.07	0.000200459	PFKFB3	6-phosphofructo-2-kinase/fructose-2,6-biphosphatase 3	5209	10	6226848, 6284845	10p14-p15	NA	Hs.195471	8830046, 9092801, 9146922, 9276680, 10072580, 10077634, 10508479, 10673355, 11245921, 11245987, 12384552, 12477932, 12935880, 12963966, 14702039, 15466858, 15489334, 15896703, 16115917, 16306349, 16311927, 16316985, 16344560, 16698023, 17143338, 17353931, 17499765, 18039179	GO:0000166: nucleotide binding, GO:0003873: 6-phosphofructo-2-kinase activity, GO:0003873: 6-phosphofructo-2-kinase activity, GO:0004331: fructose-2,6-bisphosphate 2-phosphatase activity, GO:0005524: ATP binding, GO:0005829: cytosol, GO:0008152: metabolic process, GO:0016301: kinase activity, GO:0016740: transferase activity, GO:0016787: hydrolase activity, GO:0042802: identical protein binding	00051: Fructose and mannose metabolism
57561_at	386	169	158	28	2.149	1.103	0.00148893	ARRDC3	arrestin domain containing 3	57561	5	-90700297	5q14.3	NA	Hs.718495	10718198, 12477932, 15489334, 16269462, 16344560
51141_at	616	248	373	13	2.153	1.107	0.0026511	INSIG2	insulin induced gene 2	51141	2	118562519	2q14.1	NA	Hs.7089	12242332, 12477932, 12482938, 12624180, 12842885, 14702039, 16549805, 16606821, 16614226, 17137505, 17428920, 17465681, 17471297, 17489846, 18003761, 18070740, 18162505, 18195716, 18223638, 18239574, 18270535, 18319320, 18347269, 18398047, 18426866, 18464289, 18514965, 18570692, 18615239, 18660489, 18682847, 18839134, 18989534, 19105843	GO:0005515: protein binding, GO:0005783: endoplasmic reticulum, GO:0005789: endoplasmic reticulum membrane, GO:0006629: lipid metabolic process, GO:0006991: response to sterol depletion, GO:0008202: steroid metabolic process, GO:0008203: cholesterol metabolic process, GO:0016020: membrane, GO:0016021: integral to membrane
8553_at	651	299	139	75	2.184	1.127	0.00024959	BHLHE40	basic helix-loop-helix family, member e40	8553	3	4996096	3p26	NA	Hs.171825	9240428, 10449910, 11226878, 11278694, 11668339, 11688991, 12119049, 12297495, 12354771, 12384505, 12397359, 12477932, 12624110, 12754744, 15223310, 15489334, 15560782, 15719173, 15994878, 16169070, 16344560, 16487626, 16878149, 18228528, 18557763	GO:0003700: transcription factor activity, GO:0005515: protein binding, GO:0005634: nucleus, GO:0009649: entrainment of circadian clock, GO:0016564: transcription repressor activity, GO:0045892: negative regulation of transcription, DNA-dependent, GO:0048168: regulation of neuronal synaptic plasticity	04710: Circadian rhythm
54541_at	1015	269	490	41	3.458	1.79	2.25598e-05	DDIT4	DNA-damage-inducible transcript 4	54541	10	73703682	10pter-q26.12	NA	Hs.523012	11076863, 11230166, 11256614, 11884613, 12453409, 12477932, 14646594, 15146197, 15180327, 15489336, 15592522, 15632201, 15988001, 16169070, 16258273, 16341674, 16381901, 16713569, 17005863, 17307335, 18796435, 18953439, 19114033	GO:0005622: intracellular, GO:0005737: cytoplasm, GO:0006915: apoptosis, GO:0009968: negative regulation of signal transduction	04150: mTOR signaling pathway

## Sheet: 24h upregulated
ID	mean_H_24h	mean_N_24h	sd_H_24h	sd_N_24h	FC	logFC	P.Value	symbol	Description	Gene	Chromosome	Chromosome.Location	Cytoband	GenBank	UniGene	PubMed	Gene.Ontology	Pathway
667_at	768	510	36	140	1.548	0.63	0.00865937	DST	dystonin	667	6	-56587338, -56576527, -56430743, -56430743, -56430743, -56430743, -56430743	6p12.1	NA	Hs.631992, Hs.669931	1712022, 1717441, 2045679, 2090522, 2276744, 2461961, 2579167, 2645368, 3880796, 7818282, 7919656, 8010969, 8345227, 8349819, 8575775, 8621649, 8889548, 8889549, 9872452, 10428034, 10637308, 10727295, 11323216, 11375975, 11751855, 12168954, 12421765, 12477932, 12482924, 12542537, 12802069, 14574404, 14576348, 14581450, 14702039, 14705806, 15231748, 15342556, 15489334, 15560761, 15725571, 16344560…	GO:0003779: actin binding, GO:0005178: integrin binding, GO:0005509: calcium ion binding, GO:0005515: protein binding, GO:0005515: protein binding, GO:0005604: basement membrane, GO:0005737: cytoplasm, GO:0005737: cytoplasm, GO:0005856: cytoskeleton, GO:0007050: cell cycle arrest, GO:0007155: cell adhesion, GO:0007229: integrin-mediated signaling pathway, GO:0008022: protein C-terminus binding, G…
27328_at	142	76	113	35	1.67	0.74	0.00849842	PCDH11X	protocadherin 11 X-linked	27328	X	90920959, 90976314, 90976314	Xq21.3	NA	Hs.655673	8619474, 9110174, 10644456, 10716726, 10718198, 10817752, 10835267, 11003707, 12815422, 14660691, 14727141, 15772651, 16825765, 18029348, 19136949	GO:0005509: calcium ion binding, GO:0005515: protein binding, GO:0005730: nucleolus, GO:0005737: cytoplasm, GO:0005886: plasma membrane, GO:0005887: integral to plasma membrane, GO:0007155: cell adhesion, GO:0007156: homophilic cell adhesion, GO:0043231: intracellular membrane-bounded organelle
285349_at	81	55	2	15	1.519	0.603	0.00846069	ZNF660	zinc finger protein 660	285349	3	44601459	3p21.32	NA	Hs.669324	12477932, 14702039, 15489334	GO:0003677: DNA binding, GO:0005622: intracellular, GO:0005634: nucleus, GO:0006350: transcription, GO:0006355: regulation of transcription, DNA-dependent, GO:0008270: zinc ion binding, GO:0046872: metal ion binding
100130323_at	64	29	20	9	2.209	1.143	0.00842112	LOC100133412	hypothetical protein LOC100133412	100130323	9			NA
92104_at	93	61	15	15	1.562	0.643	0.00840298	TTC30A	tetratricopeptide repeat domain 30A	92104	2	-178187271	2q31.2	NA	Hs.128384	8889548, 12477932, 14702039	GO:0005488: binding, GO:0005929: cilium, GO:0030030: cell projection organization
2256_at	258	169	67	36	1.516	0.6	0.00825749	FGF11	fibroblast growth factor 11	2256	17	7283412	17p13.1	NA	Hs.655193	8790420, 9070933, 10662545, 12477932, 14702039, 15199049, 15489334	GO:0007165: signal transduction, GO:0007267: cell-cell signaling, GO:0007399: nervous system development, GO:0008083: growth factor activity	04010: MAPK signaling pathway, 04810: Regulation of actin cytoskeleton, 05218: Melanoma
27099_at	149	84	37	30	1.807	0.853	0.00800079	C7orf54	chromosome 7 open reading frame 54	27099	7	127424797	7q31	NA	Hs.657377	12477932, 12690205, 14702039
347686_at	2241	1222	491	444	1.879	0.91	0.00773845	SNORD64	small nucleolar RNA, C/D box 64	347686	15	22781339	15q12	NA		11106375
284716_at	243	163	11	25	1.502	0.587	0.00746091	RIMKLA	ribosomal modification protein rimK-like family member A	284716	1	42619054	1p34.2	NA	Hs.420244	12477932, 15489334, 16710414	GO:0000166: nucleotide binding, GO:0003824: catalytic activity, GO:0005524: ATP binding, GO:0006464: protein modification process, GO:0030145: manganese ion binding, GO:0046872: metal ion binding
649203_at	104	69	20	23	1.548	0.63	0.0072904	LOC649203	similar to hCG1795719	649203	1		1q23.1	NA
8331_at	29	14	17	3	1.849	0.887	0.00688951	HIST1H2AJ	histone cluster 1, H2aj	8331	6	-27890058	6p22-p21.3	NA	Hs.406691	8814229, 9439656, 9566873, 10064132, 11080476, 11689053, 11790298, 12408966, 12477932, 14657027		05322: Systemic lupus erythematosus
901_at	632	335	324	149	1.794	0.843	0.006825	CCNG2	cyclin G2	901	4	78297380	4q21.1	NA	Hs.13291	8626390, 8806701, 11956189, 12452053, 12477932, 16364039, 16608856, 17123511, 18025271, 18754885, 18784254	GO:0000075: cell cycle checkpoint, GO:0005737: cytoplasm, GO:0007049: cell cycle, GO:0007067: mitosis, GO:0051301: cell division	04115: p53 signaling pathway
10344_at	276	163	96	43	1.655	0.727	0.00654409	CCL26	chemokine (C-C motif) ligand 26	10344	7	-75236777	7q11.23	NA	Hs.131342	9847074, 10373330, 10415065, 10488147, 11329013, 11425309, 11544308, 11748272, 12061839, 12192108, 12477932, 12689946, 12853948, 12975309, 15039444, 15207712, 15489334, 15521376, 15784470, 15863444, 16084752, 16264039, 16391516, 16453027, 16604488, 17073866, 17490641, 17541284, 17900656, 18055844, 18712274, 18774776, 18844613	GO:0005576: extracellular region, GO:0005615: extracellular space, GO:0006935: chemotaxis, GO:0006954: inflammatory response, GO:0006955: immune response, GO:0007165: signal transduction, GO:0007267: cell-cell signaling, GO:0008009: chemokine activity	04060: Cytokine-cytokine receptor interaction
57561_at	289	136	166	47	1.875	0.907	0.00602294	ARRDC3	arrestin domain containing 3	57561	5	-90700297	5q14.3	NA	Hs.718495	10718198, 12477932, 15489334, 16269462, 16344560
441191_at	659	440	98	76	1.502	0.587	0.00599995	RNF216L	ring finger protein 216-like	441191	7	4980141	7p22.1	NA	Hs.520636	11181995, 11854271, 12477932
7151_at	17	11	4	2	1.562	0.643	0.00599418	TOP1P1	topoisomerase (DNA) I pseudogene 1	7151	1	169574658	1q23-q24	NA	Hs.661092	2170234
2632_at	605	296	178	28	1.986	0.99	0.00597989	GBE1	glucan (1,4-alpha-), branching enzyme 1	2632	3	-81621539	3p12.3	NA	Hs.436062	6220706, 8059607, 8463281, 8613547, 9851430, 10384399, 10533307, 10545044, 10762170, 12477932, 14557872, 14702039, 15019703, 15452297, 15489334, 15592455, 16254601, 17915577, 17994551, 18289670	GO:0003844: 1,4-alpha-glucan branching enzyme activity, GO:0003844: 1,4-alpha-glucan branching enzyme activity, GO:0004553: hydrolase activity, hydrolyzing O-glycosyl compounds, GO:0005829: cytosol, GO:0005975: carbohydrate metabolic process, GO:0005978: glycogen biosynthetic process, GO:0006091: generation of precursor metabolites and energy, GO:0016757: transferase activity, transferring glycos…	00500: Starch and sucrose metabolism
5236_at	1257	760	811	509	1.655	0.727	0.00568807	PGM1	phosphoglucomutase 1	5236	1	63831534	1p31	NA	Hs.1869	1530890, 1602151, 3159642, 4517931, 7902567, 7902568, 8257433, 8586438, 8631316, 8894274, 10441333, 11785295, 11963573, 12477932, 12608294, 12942785, 15378030, 15489334, 15522220, 16710414, 18091362, 18495743	GO:0000287: magnesium ion binding, GO:0004614: phosphoglucomutase activity, GO:0004614: phosphoglucomutase activity, GO:0005737: cytoplasm, GO:0005829: cytosol, GO:0005975: carbohydrate metabolic process, GO:0006006: glucose metabolic process, GO:0016853: isomerase activity	00010: Glycolysis / Gluconeogenesis, 00030: Pentose phosphate pathway, 00052: Galactose metabolism, 00500: Starch and sucrose metabolism
55214_at	637	333	288	117	1.823	0.867	0.00546687	LEPREL1	leprecan-like 1	55214	3	-191157211, -191157211	3q28	NA	Hs.374191	8889548, 10449603, 12477932, 14702039, 15044469, 15063763, 15489334, 16344560, 18487197, 18519826	GO:0005506: iron ion binding, GO:0005783: endoplasmic reticulum, GO:0005794: Golgi apparatus, GO:0016491: oxidoreductase activity, GO:0016702: oxidoreductase activity, acting on single donors with incorporation of molecular oxygen, incorporation of two atoms of oxygen, GO:0016706: oxidoreductase activity, acting on paired donors, with incorporation or reduction of molecular oxygen, 2-oxoglutarate…
29923_at	503	287	160	43	1.693	0.76	0.0054073	HIG2	hypoxia-inducible protein 2	29923	7	127883119	7q32.1	NA	Hs.710088	8125298, 9373149, 10690527, 12477932, 12690205, 15489334, 15930302	GO:0006950: response to stress, GO:0016020: membrane, GO:0016021: integral to membrane
1910_at	567	311	466	210	1.674	0.743	0.00523819	EDNRB	endothelin receptor type B	1910	13	-77367616, -77367616	13q22	NA	Hs.82002	1282938, 1291713, 1648908, 1659806, 1710450, 1713452, 2175394, 7987295, 8001158, 8001160, 8429023, 8440682, 8630503, 8634719, 8810293, 8852658, 8852659, 8852660, 8982507, 9211925, 9261180, 9284755, 9359036, 9556633, 9760196, 10072757, 10090908, 10510297, 10528251, 10789830, 11376172, 11471546, 11565556, 11601839, 11829485, 11854280, 11891690, 11920632, 11930911, 11982704, 12117726, 12135322, 1218…	GO:0001600: endothelin-B receptor activity, GO:0001755: neural crest cell migration, GO:0004872: receptor activity, GO:0004930: G-protein coupled receptor activity, GO:0005515: protein binding, GO:0005886: plasma membrane, GO:0005887: integral to plasma membrane, GO:0006885: regulation of pH, GO:0007194: negative regulation of adenylate cyclase activity, GO:0007200: activation of phospholipase C …	04020: Calcium signaling pathway, 04080: Neuroactive ligand-receptor interaction, 04916: Melanogenesis
90338_at	539	342	132	7	1.544	0.627	0.00515316	ZNF160	zinc finger protein 160	90338	19	-58261678	19q13.41	NA	Hs.655967	7774943, 7865130, 10997877, 11214971, 11410164, 12477932, 14702039, 16344560	GO:0003677: DNA binding, GO:0005622: intracellular, GO:0006350: transcription, GO:0008270: zinc ion binding, GO:0030097: hemopoiesis, GO:0046872: metal ion binding
55076_at	653	334	265	56	1.84	0.88	0.00477989	TMEM45A	transmembrane protein 45A	55076	3	101694152	3q12.2	NA	Hs.658956	12477932, 14702039, 15489334	GO:0016020: membrane, GO:0016021: integral to membrane
6018_at	413	262	139	71	1.54	0.623	0.00424291	RLF	rearranged L-myc fusion	6018	1	40399627	1p32	NA	Hs.205627	1649386, 8545128, 10545207, 12477932, 14597674, 15231748, 15489334, 16696853, 16710414, 17081983	GO:0003700: transcription factor activity, GO:0005515: protein binding, GO:0005622: intracellular, GO:0005634: nucleus, GO:0006350: transcription, GO:0006355: regulation of transcription, DNA-dependent, GO:0008270: zinc ion binding, GO:0046872: metal ion binding
6092_at	134	80	49	18	1.625	0.7	0.0042183	ROBO2	roundabout, axon guidance receptor, homolog 2 (Drosophila)	6092	3	77171983, 77229852	3p12.3	NA	Hs.13305	9458045, 10102268, 10197527, 10997877, 11404413, 12477932, 12504588, 15130495, 15489334, 16169070, 16829019, 17357069, 18235093, 18270976, 19023125	GO:0001657: ureteric bud development, GO:0006935: chemotaxis, GO:0007156: homophilic cell adhesion, GO:0007275: multicellular organismal development, GO:0007420: brain development, GO:0008046: axon guidance receptor activity, GO:0009986: cell surface, GO:0016020: membrane, GO:0016021: integral to membrane, GO:0030154: cell differentiation, GO:0042802: identical protein binding, GO:0050772: positi…	04360: Axon guidance
100127886_at	22	14	5	2	1.566	0.647	0.00408182	PRO0628	uncharacterized protein PRO0628-like	100127886	20		20q12	NA		11780052
79860_at	49	26	10	9	1.945	0.96	0.00390567	FLJ21369	hypothetical protein FLJ21369	79860	19		19q13.11	NA	Hs.529098
387254_at	960	645	200	179	1.502	0.587	0.00367435	IMAA	SLC7A5 pseudogene	387254	16	-21436730	16p12.2	NA	Hs.448808, Hs.664952	12009310, 12477932	GO:0015179: L-amino acid transmembrane transporter activity, GO:0015807: L-amino acid transport, GO:0016020: membrane, GO:0016021: integral to membrane
5033_at	1866	942	900	216	1.811	0.857	0.00358917	P4HA1	prolyl 4-hydroxylase, alpha polypeptide I	5033	10	-74436987	10q21.3-q23.1	NA	Hs.500047, Hs.593005	2543975, 2556027, 7961714, 8125298, 9211872, 9373149, 9417920, 12477932, 15028279, 15164054, 15369792, 15489334, 16344560, 16464861, 16488890, 16837461, 16877351, 16885164, 18029348	GO:0004656: procollagen-proline 4-dioxygenase activity, GO:0005488: binding, GO:0005506: iron ion binding, GO:0005739: mitochondrion, GO:0005783: endoplasmic reticulum, GO:0005788: endoplasmic reticulum lumen, GO:0016491: oxidoreductase activity, GO:0016702: oxidoreductase activity, acting on single donors with incorporation of molecular oxygen, incorporation of two atoms of oxygen, GO:0016706: o…	00330: Arginine and proline metabolism
100129548_at	109	71	11	14	1.544	0.627	0.00346282	LOC100129548	hypothetical protein LOC100129548	100129548	20		20q11.23	NA	Hs.712804
2170_at	173	115	13	17	1.512	0.597	0.00314968	FABP3	fatty acid binding protein 3, muscle and heart (mammary-derived growth inhibitor)	2170	1	-31610686	1p33-p32	NA	Hs.657242	1526991, 1710107, 2040092, 2266954, 2266970, 3421901, 7498159, 7691977, 7757968, 7922029, 7962070, 8262516, 8326460, 8661024, 12477932, 12721663, 12872269, 15068254, 15459486, 15489334, 16429158, 16710414, 17289870, 17721027, 17826730, 18021874, 18159110, 18256058, 18412949, 18437121, 18460953, 18469019, 18660489	GO:0005215: transporter activity, GO:0005737: cytoplasm, GO:0006656: phosphatidylcholine biosynthetic process, GO:0006810: transport, GO:0008285: negative regulation of cell proliferation, GO:0008289: lipid binding	03320: PPAR signaling pathway
728987_at	76	42	31	9	1.753	0.81	0.00294118	LOC728987	hypothetical LOC728987	728987	1		1q42.2	NA	Hs.683991
55902_at	298	174	106	21	1.64	0.713	0.00275609	ACSS2	acyl-CoA synthetase short-chain family member 2	55902	20	32926405, 32928035	20q11.22	NA	Hs.517034	10843999, 11780052, 12477932, 14702039, 15231747, 15489334, 16344560, 16788062, 18029348, 18660489	GO:0003987: acetate-CoA ligase activity, GO:0003987: acetate-CoA ligase activity, GO:0005515: protein binding, GO:0005634: nucleus, GO:0005730: nucleolus, GO:0005737: cytoplasm, GO:0005829: cytosol, GO:0008152: metabolic process, GO:0008610: lipid biosynthetic process, GO:0016208: AMP binding, GO:0016874: ligase activity	00010: Glycolysis / Gluconeogenesis, 00620: Pyruvate metabolism, 00640: Propanoate metabolism, 00720: Reductive carboxylate cycle (CO2 fixation)
100033423_at	244	135	100	10	1.701	0.767	0.00269059	SNORD116-11	small nucleolar RNA, C/D box 116-11	100033423	15	22872167	15q11.2	NA		11106375, 11726556
112399_at	405	250	120	24	1.58	0.66	0.00266277	EGLN3	egl nine homolog 3 (C. elegans)	112399	14	-33463171	14q13.1	NA	Hs.135507	8125298, 9373149, 11574160, 11595178, 11595184, 11598268, 12163023, 12477932, 12615973, 12670503, 14702039, 15156561, 15247232, 15251459, 15489334, 15721254, 16098468, 16407229, 16958618, 17003045, 17684156, 18337469, 18347341, 18927305, 18954447	GO:0005506: iron ion binding, GO:0005515: protein binding, GO:0005634: nucleus, GO:0005737: cytoplasm, GO:0006915: apoptosis, GO:0016491: oxidoreductase activity, GO:0016702: oxidoreductase activity, acting on single donors with incorporation of molecular oxygen, incorporation of two atoms of oxygen, GO:0016706: oxidoreductase activity, acting on paired donors, with incorporation or reduction of …	05211: Renal cell carcinoma
148523_at	141	80	36	11	1.725	0.787	0.00249444	C1orf51	chromosome 1 open reading frame 51	148523	1	148521852	1q21.2	NA	Hs.54680	12477932, 14702039, 15489334, 16710414
139596_at	261	142	84	31	1.807	0.853	0.00241126	UPRT	uracil phosphoribosyltransferase (FUR1) homolog (S. cerevisiae)	139596	X	74410685	Xq13.3	NA	Hs.91612	12477932, 14702039, 15489334, 15772651, 16189514, 17384901	GO:0004845: uracil phosphoribosyltransferase activity, GO:0005634: nucleus, GO:0005737: cytoplasm, GO:0016757: transferase activity, transferring glycosyl groups	00240: Pyrimidine metabolism
4501_at	3869	2358	755	25	1.621	0.697	0.00232672	MT1X	metallothionein 1X	4501	16	55273882	16q13	NA	Hs.374950	2286373, 8049263, 8119276, 8619255, 9074634, 9831543, 10575295, 10754528, 10774930, 11076863, 11168427, 11693492, 12477932, 12539042, 14718574, 15489334, 15489336, 16381901	GO:0005507: copper ion binding, GO:0008270: zinc ion binding, GO:0010038: response to metal ion, GO:0046870: cadmium ion binding, GO:0046872: metal ion binding
664_at	2216	847	1131	586	2.783	1.477	0.00206306	BNIP3	BCL2/adenovirus E1B 19kDa interacting protein 3	664	10	-133631193	10q26.3	NA	Hs.144873	7478990, 7954800, 8125298, 9373149, 9396766, 9575197, 9867803, 9973195, 10381623, 10625696, 10891486, 12215374, 12477932, 12690108, 12879018, 15164054, 15289340, 15328198, 15489334, 15560738, 15709167, 15856026, 16002567, 16169070, 16189514, 16217754, 16219518, 16357180, 16765911, 16799636, 16803523, 17255267, 17360363, 17394490, 17576382, 17576813, 17638546, 17638890, 17729412, 17786027, 1792829…	GO:0005635: nuclear envelope, GO:0005739: mitochondrion, GO:0005739: mitochondrion, GO:0006309: DNA fragmentation during apoptosis, GO:0006338: chromatin remodeling, GO:0006800: oxygen and reactive oxygen species metabolic process, GO:0006916: anti-apoptosis, GO:0006917: induction of apoptosis, GO:0008219: cell death, GO:0008634: negative regulation of survival gene product expression, GO:0016020…
100129169_at	76	42	14	4	1.815	0.86	0.0020333	LOC100129169	hypothetical protein LOC100129169	100129169	2		2q31.1	NA	Hs.570084
100129905_at	50	33	5	3	1.512	0.597	0.00195968	RPS27P19	ribosomal protein S27 pseudogene 19	100129905	11		11q23.3	NA		19123937
665_at	1000	627	353	167	1.562	0.643	0.00167227	BNIP3L	BCL2/adenovirus E1B 19kDa interacting protein 3-like	665	8	26296439	8p21	NA	Hs.131226	9523198, 9867803, 9973195, 10381623, 10467396, 11230166, 12477932, 12606722, 12663450, 14720367, 15489334, 15607964, 16189514, 16219518, 17081983, 18048346, 18551130, 18670647	GO:0005521: lamin binding, GO:0005634: nucleus, GO:0005635: nuclear envelope, GO:0005739: mitochondrion, GO:0005740: mitochondrial envelope, GO:0005783: endoplasmic reticulum, GO:0006917: induction of apoptosis, GO:0008634: negative regulation of survival gene product expression, GO:0016020: membrane, GO:0016021: integral to membrane, GO:0042803: protein homodimerization activity, GO:0043066: neg…
89782_at	138	86	36	6	1.566	0.647	0.00161823	LMLN	leishmanolysin-like (metallopeptidase M8 family)	89782	3	199171467	3q29	NA	Hs.518540	15557119, 16344560	GO:0004222: metalloendopeptidase activity, GO:0005737: cytoplasm, GO:0006508: proteolysis, GO:0007049: cell cycle, GO:0007067: mitosis, GO:0007155: cell adhesion, GO:0008233: peptidase activity, GO:0008270: zinc ion binding, GO:0016020: membrane, GO:0046872: metal ion binding, GO:0051301: cell division
135154_at	105	62	24	5	1.674	0.743	0.00150596	C6orf57	chromosome 6 open reading frame 57	135154	6	71333345	6q13	NA	Hs.418495	12477932, 14574404, 15489334	GO:0005576: extracellular region
9123_at	1374	715	452	110	1.857	0.893	0.00115729	SLC16A3	solute carrier family 16, member 3 (monocarboxylic acid transporter 4)	9123	17	77779581, 77780177, 77783432	17q25	NA	Hs.500761	8125298, 9373149, 9425115, 10510291, 10921872, 12477932, 12657613, 12739169, 15489334, 17081983, 17502341	GO:0005624: membrane fraction, GO:0005886: plasma membrane, GO:0005887: integral to plasma membrane, GO:0006810: transport, GO:0015293: symporter activity, GO:0015355: secondary active monocarboxylate transmembrane transporter activity, GO:0015711: organic anion transport, GO:0015718: monocarboxylic acid transport
8553_at	544	277	144	36	1.923	0.943	0.00114843	BHLHE40	basic helix-loop-helix family, member e40	8553	3	4996096	3p26	NA	Hs.171825	9240428, 10449910, 11226878, 11278694, 11668339, 11688991, 12119049, 12297495, 12354771, 12384505, 12397359, 12477932, 12624110, 12754744, 15223310, 15489334, 15560782, 15719173, 15994878, 16169070, 16344560, 16487626, 16878149, 18228528, 18557763	GO:0003700: transcription factor activity, GO:0005515: protein binding, GO:0005634: nucleus, GO:0009649: entrainment of circadian clock, GO:0016564: transcription repressor activity, GO:0045892: negative regulation of transcription, DNA-dependent, GO:0048168: regulation of neuronal synaptic plasticity	04710: Circadian rhythm
9708_at	84	56	20	12	1.502	0.587	0.00114822	PCDHGA8	protocadherin gamma subfamily A, 8	9708	5	140751666, 140751666	5q31	NA	Hs.368160	9205841, 10380929, 10716726, 10817752, 10835267, 11230163	GO:0005509: calcium ion binding, GO:0005515: protein binding, GO:0005886: plasma membrane, GO:0007155: cell adhesion, GO:0007156: homophilic cell adhesion, GO:0016021: integral to membrane
5787_at	60	39	6	7	1.526	0.61	0.00104484	PTPRB	protein tyrosine phosphatase, receptor type, B	5787	12	-69196898, -69196898	12q15-q21	NA	Hs.434375	1373652, 1486802, 1645282, 2169617, 2170109, 7575486, 7628014, 9049255, 9118959, 9263011, 9584610, 10557082, 10706604, 10769382, 11313993, 12068634, 12234928, 12477932, 12615970, 12700241, 12907755, 14702039, 15144186, 15638728, 16344560, 17081983, 18361428	GO:0005001: transmembrane receptor protein tyrosine phosphatase activity, GO:0005515: protein binding, GO:0005887: integral to plasma membrane, GO:0006470: protein amino acid dephosphorylation, GO:0016020: membrane, GO:0016787: hydrolase activity	04520: Adherens junction
6095_at	145	91	29	5	1.58	0.66	0.00103962	RORA	RAR-related orphan receptor A	6095	15	-58567776, -58567776, -58567776	15q21.3	NA	Hs.560343, Hs.655155	7490103, 7706239, 7838158, 7916608, 7926749, 7935491, 8858107, 9862959, 10478845, 10900268, 11121580, 12114512, 12168086, 12377782, 12477932, 14722075, 14741380, 14742449, 15013753, 15489334, 15662020, 15781255, 15790933, 15886715, 16189514, 16539693, 16632463, 16713569, 17512500, 17545671, 18658046, 19041634	GO:0003700: transcription factor activity, GO:0003707: steroid hormone receptor activity, GO:0005515: protein binding, GO:0005634: nucleus, GO:0006350: transcription, GO:0006355: regulation of transcription, DNA-dependent, GO:0006809: nitric oxide biosynthetic process, GO:0007165: signal transduction, GO:0008270: zinc ion binding, GO:0021702: cerebellar Purkinje cell differentiation, GO:0043030: …
100129717_at	147	85	8	37	1.832	0.873	0.00103358	LOC100129717	hypothetical protein LOC100129717	100129717	8		8p21.2	NA	Hs.701949
10144_at	253	160	70	4	1.54	0.623	0.00101131	FAM13A	family with sequence similarity 13, member A	10144	4	-89866128, -89866128	4q22.1	NA	Hs.97270	9314494, 10048485, 12477932, 14702039, 15234000, 15302935, 16964243
80853_at	189	109	78	36	1.682	0.75	0.00100902	JHDM1D	jumonji C domain containing histone demethylase 1 homolog D (S. cerevisiae)	80853	7	-139431014	7q34	NA	Hs.308710	11214970, 12477932, 14702039	GO:0005515: protein binding, GO:0008270: zinc ion binding, GO:0046872: metal ion binding
84058_at	785	467	294	105	1.621	0.697	0.000974867	WDR54	WD repeat domain 54	84058	2	74502392	2p13.1	NA	Hs.643480	8125298, 9373149, 12477932, 14702039, 15489334, 15592455
79365_at	274	125	91	18	2.119	1.083	0.00089747	BHLHE41	basic helix-loop-helix family, member e41	79365	12	-26164227	12p11.23-p12.1	NA	Hs.177841	11058868, 11162494, 11278948, 12354771, 12397359, 12477932, 12624110, 12657651, 16287852, 17194498, 18223678, 18228528, 18345027, 18411297, 18557763	GO:0008283: cell proliferation, GO:0009887: organ morphogenesis, GO:0030154: cell differentiation	04710: Circadian rhythm
158471_at	87	55	13	6	1.573	0.653	0.000841916	PRUNE2	prune homolog 2 (Drosophila)	158471	9	-78416111	9q21.13	NA	Hs.262857	9205841, 11181995, 12168954, 12477932, 15164053, 15489334, 16189514, 16288218, 16344560, 17081983, 17360660, 18445682	GO:0005737: cytoplasm, GO:0006915: apoptosis, GO:0006917: induction of apoptosis, GO:0016491: oxidoreductase activity, GO:0030145: manganese ion binding, GO:0046872: metal ion binding, GO:0046914: transition metal ion binding, GO:0051318: G1 phase
641737_at	458	301	68	16	1.516	0.6	0.000821398	FLJ44124	hypothetical LOC641737	641737	7		7p22.3	NA	Hs.655030
11314_at	109	72	17	18	1.533	0.617	0.000818211	CD300A	CD300a molecule	11314	17	69974116	17q25.1	NA	Hs.9688	1349532, 9701027, 10540326, 10746781, 12456026, 12477932, 15489334, 16339535, 17588661, 18424727, 18535206	GO:0004872: receptor activity, GO:0005515: protein binding, GO:0005886: plasma membrane, GO:0006955: immune response, GO:0007155: cell adhesion, GO:0016021: integral to membrane
729046_at	84	33	25	6	2.514	1.33	0.000788677	LOC729046	hypothetical LOC729046	729046	10		10q22.1	NA
26355_at	699	279	373	114	2.335	1.223	0.000761036	FAM162A	family with sequence similarity 162, member A	26355	3	123585712	3q21.1	NA	Hs.584881	11085516, 12477932, 14702039, 15082785, 15489334, 16698020	GO:0016020: membrane, GO:0016021: integral to membrane
9241_at	162	104	32	24	1.558	0.64	0.000715737	NOG	noggin	9241	17	52026058	17q21-q22	NA	Hs.248201	7557985, 7666191, 8752214, 9585504, 9603738, 9634519, 10080184, 10087923, 10657699, 10780858, 11545688, 11562478, 11580864, 11706034, 11846737, 11857750, 12089654, 12115893, 12404109, 12477932, 12478285, 12621334, 14999064, 15264296, 15489334, 15621726, 15756420, 16126463, 16151340, 16532400, 17029022, 17138967, 17200191, 17218603, 17668388, 17696196, 17889703, 18019378, 18204269, 18391951, 18560…	GO:0001649: osteoblast differentiation, GO:0001657: ureteric bud development, GO:0001837: epithelial to mesenchymal transition, GO:0005576: extracellular region, GO:0005576: extracellular region, GO:0005615: extracellular space, GO:0007389: pattern specification process, GO:0007420: brain development, GO:0007605: sensory perception of sound, GO:0009953: dorsal/ventral pattern formation, GO:001995…	04350: TGF-beta signaling pathway
57683_at	442	257	166	49	1.662	0.733	0.000620212	ZDBF2	zinc finger, DBF-type containing 2	57683	2	206847767	2q33.3	NA	Hs.110489	10997877, 14702039	GO:0003676: nucleic acid binding, GO:0008270: zinc ion binding, GO:0046872: metal ion binding
100128995_at	19	10	7	4	1.941	0.957	0.000598841	LOC100133366	similar to PAMP6501	100128995	6			NA
114_at	150	89	2	23	1.717	0.78	0.000511235	ADCY8	adenylate cyclase 8 (brain)	114	8	-131861728	8q24	NA	Hs.591859	1427768, 1715695, 8076676, 8163524, 10075700, 10089566, 10807185, 10808179, 11076863, 11299302, 11457491, 11884542, 12477932, 12503609, 12626323, 12890691, 16258073, 16613843, 17586501, 18163389, 18480272, 19156168	GO:0000287: magnesium ion binding, GO:0005624: membrane fraction, GO:0005886: plasma membrane, GO:0006171: cAMP biosynthetic process, GO:0007611: learning or memory, GO:0008294: calcium- and calmodulin-responsive adenylate cyclase activity, GO:0009755: hormone-mediated signaling, GO:0016021: integral to membrane	00230: Purine metabolism, 04020: Calcium signaling pathway, 04540: Gap junction, 04720: Long-term potentiation, 04742: Taste transduction, 04912: GnRH signaling pathway, 04916: Melanogenesis
401152_at	121	61	43	10	1.892	0.92	0.000507678	C4orf3	chromosome 4 open reading frame 3	401152	4	-120437021	4q26	NA	Hs.701808, Hs.718451	8889548, 12477932, 15146197, 16174453, 16344560	GO:0016020: membrane, GO:0016021: integral to membrane
153768_at	184	104	62	24	1.729	0.79	0.000503937	PRELID2	PRELI domain containing 2	153768	5	-145118774, -145118774	5q32	NA	Hs.314261	12477932, 14702039
2042_at	48	29	11	7	1.647	0.72	0.000452133	EPHA3	EPH receptor A3	2042	3	89239363, 89239363	3p11.2	NA	Hs.123642	1311845, 1737782, 8070404, 8188238, 8559144, 9195962, 9245480, 9267020, 9530499, 9576626, 9685371, 9751130, 9932438, 10207129, 10730216, 10987298, 11128993, 11256076, 11870224, 11877430, 12477932, 14697337, 14702039, 14759258, 15355990, 16239146, 16941478, 17192257, 18385452, 18547520, 18814179	GO:0000166: nucleotide binding, GO:0004872: receptor activity, GO:0005003: ephrin receptor activity, GO:0005524: ATP binding, GO:0005576: extracellular region, GO:0005886: plasma membrane, GO:0005887: integral to plasma membrane, GO:0006468: protein amino acid phosphorylation, GO:0007165: signal transduction, GO:0007169: transmembrane receptor protein tyrosine kinase signaling pathway, GO:0016740…	04360: Axon guidance
51141_at	720	248	352	47	2.627	1.393	0.000416008	INSIG2	insulin induced gene 2	51141	2	118562519	2q14.1	NA	Hs.7089	12242332, 12477932, 12482938, 12624180, 12842885, 14702039, 16549805, 16606821, 16614226, 17137505, 17428920, 17465681, 17471297, 17489846, 18003761, 18070740, 18162505, 18195716, 18223638, 18239574, 18270535, 18319320, 18347269, 18398047, 18426866, 18464289, 18514965, 18570692, 18615239, 18660489, 18682847, 18839134, 18989534, 19105843	GO:0005515: protein binding, GO:0005783: endoplasmic reticulum, GO:0005789: endoplasmic reticulum membrane, GO:0006629: lipid metabolic process, GO:0006991: response to sterol depletion, GO:0008202: steroid metabolic process, GO:0008203: cholesterol metabolic process, GO:0016020: membrane, GO:0016021: integral to membrane
441054_at	93	36	34	6	2.468	1.303	0.000405354	C4orf47	chromosome 4 open reading frame 47	441054	4	186587538	4q35.1	NA	Hs.549398	12477932, 15489334, 15809229
441521_at	25	10	7	2	2.428	1.28	0.000368102	RP13-36C9.6	cancer/testis antigen CT45-5	441521	X	-134773629	Xq26.3	NA	Hs.535081	12477932, 15905330
3099_at	1045	598	197	109	1.741	0.8	0.000365797	HK2	hexokinase 2	3099	2	74913289	2p13	NA	Hs.406266, Hs.591588	7518342, 7622509, 7883120, 7883122, 7883123, 8250948, 8307259, 8567628, 8786021, 8889548, 9056853, 9278438, 9447955, 11068878, 11688991, 12477932, 12663490, 14672622, 14747281, 15489334, 15710218, 15967114, 16189514, 16396496, 16551620, 16713569, 17785433, 18271924, 18535403, 18772588	GO:0000166: nucleotide binding, GO:0004396: hexokinase activity, GO:0004396: hexokinase activity, GO:0005524: ATP binding, GO:0005739: mitochondrion, GO:0005741: mitochondrial outer membrane, GO:0005829: cytosol, GO:0006006: glucose metabolic process, GO:0006096: glycolysis, GO:0007595: lactation, GO:0016020: membrane, GO:0016301: kinase activity, GO:0016740: transferase activity, GO:0046835: car…	00010: Glycolysis / Gluconeogenesis, 00051: Fructose and mannose metabolism, 00052: Galactose metabolism, 00500: Starch and sucrose metabolism, 00530: Aminosugars metabolism
3939_at	5420	3477	1104	413	1.544	0.627	0.000335398	LDHA	lactate dehydrogenase A	3939	11	18372511	11p15.4	NA	Hs.2795	1297552, 1445373, 1953713, 1959923, 2315312, 2334430, 2434947, 3000353, 3838278, 5014440, 7908613, 8125298, 8327147, 9373149, 10508479, 10897012, 11125887, 11276087, 11582518, 12107167, 12145195, 12160330, 12477932, 12555229, 12629811, 12712614, 14702039, 14760703, 15231747, 15240094, 15489334, 15592455, 15635413, 15710247, 16132575, 16344560, 16766262, 17178662, 17220478, 17483170, 18039033, 185…	GO:0004459: L-lactate dehydrogenase activity, GO:0005515: protein binding, GO:0005737: cytoplasm, GO:0005829: cytosol, GO:0016491: oxidoreductase activity, GO:0019642: anaerobic glycolysis, GO:0044262: cellular carbohydrate metabolic process, GO:0055114: oxidation reduction	00010: Glycolysis / Gluconeogenesis, 00272: Cysteine metabolism, 00620: Pyruvate metabolism, 00640: Propanoate metabolism
55112_at	237	141	68	12	1.632	0.707	0.000329956	WDR60	WD repeat domain 60	55112	7	158342029	7q36.3	NA	Hs.389945	8889548, 12477932, 12690205, 14702039, 15489334, 16344560, 18391950
54541_at	788	285	357	68	2.579	1.367	0.00031943	DDIT4	DNA-damage-inducible transcript 4	54541	10	73703682	10pter-q26.12	NA	Hs.523012	11076863, 11230166, 11256614, 11884613, 12453409, 12477932, 14646594, 15146197, 15180327, 15489336, 15592522, 15632201, 15988001, 16169070, 16258273, 16341674, 16381901, 16713569, 17005863, 17307335, 18796435, 18953439, 19114033	GO:0005622: intracellular, GO:0005737: cytoplasm, GO:0006915: apoptosis, GO:0009968: negative regulation of signal transduction	04150: mTOR signaling pathway
5563_at	238	150	65	38	1.573	0.653	0.000309394	PRKAA2	protein kinase, AMP-activated, alpha 2 catalytic subunit	5563	1	56883577	1p31	NA	Hs.437039	1365882, 1536860, 7959015, 7988703, 8889548, 9148944, 9224708, 10642499, 10698692, 10760274, 11389854, 11797013, 12067722, 12091379, 12391032, 12413941, 12427743, 12444247, 12456889, 12477932, 12511592, 12519745, 12663462, 12788940, 12847291, 12941758, 14613924, 14651849, 14709557, 14729328, 14742438, 14985344, 14985505, 15058305, 15060529, 15231718, 15297373, 15371448, 15489334, 15572372, 156401…	GO:0000166: nucleotide binding, GO:0000287: magnesium ion binding, GO:0004674: protein serine/threonine kinase activity, GO:0005515: protein binding, GO:0005524: ATP binding, GO:0005634: nucleus, GO:0005654: nucleoplasm, GO:0005829: cytosol, GO:0006468: protein amino acid phosphorylation, GO:0006633: fatty acid biosynthetic process, GO:0006695: cholesterol biosynthetic process, GO:0007165: signal…	04140: Regulation of autophagy, 04150: mTOR signaling pathway, 04910: Insulin signaling pathway, 04920: Adipocytokine signaling pathway
2821_at	2554	1591	602	217	1.584	0.663	0.0002518	GPI	glucose phosphate isomerase	2821	19	39547908	19q13.1	NA	Hs.466471	2387591, 2544027, 2547084, 3020690, 3352745, 7435496, 7545951, 7989588, 8499925, 8575767, 8822952, 8822954, 9446754, 9616041, 9856489, 10216265, 10727272, 10916680, 11004567, 11264592, 11418246, 11431735, 11688991, 11896391, 11896393, 12054796, 12477932, 12517804, 12527360, 12573240, 12737943, 12783864, 14566819, 14715248, 15034067, 15059907, 15290745, 15369782, 15489334, 15570012, 15637053, 1585…	GO:0004347: glucose-6-phosphate isomerase activity, GO:0005125: cytokine activity, GO:0005515: protein binding, GO:0005615: extracellular space, GO:0005737: cytoplasm, GO:0005975: carbohydrate metabolic process, GO:0006094: gluconeogenesis, GO:0006096: glycolysis, GO:0006959: humoral immune response, GO:0007599: hemostasis, GO:0008083: growth factor activity, GO:0016853: isomerase activity	00010: Glycolysis / Gluconeogenesis, 00030: Pentose phosphate pathway, 00500: Starch and sucrose metabolism
5230_at	2041	942	1141	333	2.023	1.017	0.000234124	PGK1	phosphoglycerate kinase 1	5230	X	77246321	Xq13	NA	Hs.78771	1533225, 1547346, 1586722, 1602151, 1837552, 2001457, 2324090, 2347494, 2814502, 2995995, 3453121, 6099325, 6188151, 6933565, 6941312, 7391027, 7391028, 7440217, 7892275, 8043870, 8075252, 8089148, 8615693, 8673469, 8889548, 9023984, 9075577, 9744480, 11745195, 12080078, 12174867, 12477932, 12488440, 12869554, 14733918, 14764427, 15053920, 15255553, 15489334, 15592455, 15952740, 16236267, 1636379…	GO:0000166: nucleotide binding, GO:0005737: cytoplasm, GO:0006096: glycolysis, GO:0016740: transferase activity	00010: Glycolysis / Gluconeogenesis
144568_at	219	123	94	34	1.693	0.76	0.0001687	A2ML1	alpha-2-macroglobulin-like 1	144568	12	8866416	12p13.31	NA	Hs.620532	10737800, 12477932, 14702039, 16298998, 16344560, 17562024, 18648652	GO:0004867: serine-type endopeptidase inhibitor activity, GO:0005515: protein binding, GO:0005576: extracellular region, GO:0005615: extracellular space, GO:0017114: wide-spectrum protease inhibitor activity, GO:0052548: regulation of endopeptidase activity
80070_at	247	107	63	14	2.261	1.177	0.0001545	ADAMTS20	ADAM metallopeptidase with thrombospondin type 1 motif, 20	80070	12	-42034278	12q12	NA	Hs.287554	12514189, 12562771, 14702039	GO:0004222: metalloendopeptidase activity, GO:0005576: extracellular region, GO:0005578: proteinaceous extracellular matrix, GO:0005615: extracellular space, GO:0006508: proteolysis, GO:0008233: peptidase activity, GO:0008270: zinc ion binding, GO:0009967: positive regulation of signal transduction, GO:0030198: extracellular matrix organization, GO:0043066: negative regulation of apoptosis, GO:00…
5210_at	715	286	233	15	2.395	1.26	0.000113339	PFKFB4	6-phosphofructo-2-kinase/fructose-2,6-biphosphatase 4	5210	3	-48530120	3p22-p21	NA	Hs.476217	8830046, 10095107, 12477932, 15474002, 15489334, 15642344, 15925437, 17143338	GO:0000166: nucleotide binding, GO:0003873: 6-phosphofructo-2-kinase activity, GO:0003873: 6-phosphofructo-2-kinase activity, GO:0004331: fructose-2,6-bisphosphate 2-phosphatase activity, GO:0005524: ATP binding, GO:0005829: cytosol, GO:0008152: metabolic process, GO:0016301: kinase activity, GO:0016740: transferase activity, GO:0016787: hydrolase activity	00051: Fructose and mannose metabolism
55818_at	569	212	273	56	2.479	1.31	0.000112341	JMJD1A	jumonji domain containing 1A	55818	2	86521864	2p11.2	NA	Hs.557425	9872452, 12477932, 14702039, 15302935, 15489334, 15815621, 16603237, 18538129, 18713068	GO:0005506: iron ion binding, GO:0005634: nucleus, GO:0006355: regulation of transcription, DNA-dependent, GO:0008270: zinc ion binding, GO:0009755: hormone-mediated signaling, GO:0016491: oxidoreductase activity, GO:0016568: chromatin modification, GO:0016702: oxidoreductase activity, acting on single donors with incorporation of molecular oxygen, incorporation of two atoms of oxygen, GO:0030521…
5209_at	964	424	307	71	2.204	1.14	0.000109674	PFKFB3	6-phosphofructo-2-kinase/fructose-2,6-biphosphatase 3	5209	10	6226848, 6284845	10p14-p15	NA	Hs.195471	8830046, 9092801, 9146922, 9276680, 10072580, 10077634, 10508479, 10673355, 11245921, 11245987, 12384552, 12477932, 12935880, 12963966, 14702039, 15466858, 15489334, 15896703, 16115917, 16306349, 16311927, 16316985, 16344560, 16698023, 17143338, 17353931, 17499765, 18039179	GO:0000166: nucleotide binding, GO:0003873: 6-phosphofructo-2-kinase activity, GO:0003873: 6-phosphofructo-2-kinase activity, GO:0004331: fructose-2,6-bisphosphate 2-phosphatase activity, GO:0005524: ATP binding, GO:0005829: cytosol, GO:0008152: metabolic process, GO:0016301: kinase activity, GO:0016740: transferase activity, GO:0016787: hydrolase activity, GO:0042802: identical protein binding	00051: Fructose and mannose metabolism
8701_at	73	40	11	2	1.798	0.847	9.59e-05	DNAH11	dynein, axonemal, heavy chain 11	8701	7	21549357	7p21	NA	Hs.520245, Hs.655326	9256245, 9325061, 10737800, 12142464, 12853948, 14702039, 15304525, 15375157, 18022865, 18492703, 19060911	GO:0000166: nucleotide binding, GO:0001539: ciliary or flagellar motility, GO:0005524: ATP binding, GO:0005874: microtubule, GO:0005929: cilium, GO:0007018: microtubule-based movement, GO:0007368: determination of left/right symmetry, GO:0016887: ATPase activity
51299_at	379	68	326	5	4.248	2.087	9.01e-05	NRN1	neuritin 1	51299	6	-5943231	6p25.1	NA	Hs.103291	9122250, 12477932, 14574404, 14702039, 15489334, 16723126, 18265009	GO:0005886: plasma membrane, GO:0031225: anchored to membrane
230_at	779	400	284	69	1.87	0.903	7.12e-05	ALDOC	aldolase C, fructose-bisphosphate	230	17	-23924259	17cen-q12	NA	Hs.155247	2209624, 2731939, 3105602, 3267224, 3674018, 5230152, 8619474, 9110174, 9244396, 11399750, 11876650, 12477932, 15489334, 15537755, 15589842, 16916647, 19034380, 19110265	GO:0004332: fructose-bisphosphate aldolase activity, GO:0005739: mitochondrion, GO:0005856: cytoskeleton, GO:0006096: glycolysis, GO:0008092: cytoskeletal protein binding, GO:0008152: metabolic process, GO:0016829: lyase activity, GO:0030388: fructose 1,6-bisphosphate metabolic process	00010: Glycolysis / Gluconeogenesis, 00030: Pentose phosphate pathway, 00051: Fructose and mannose metabolism
5163_at	1061	386	499	199	2.828	1.5	5.4e-05	PDK1	pyruvate dehydrogenase kinase, isozyme 1	5163	2	173129024	2q31.1	NA	Hs.470633	7499431, 7864652, 9445476, 9512493, 9707564, 9748166, 10357815, 10480933, 10567431, 10748151, 10753910, 10896934, 10995762, 11222751, 11278835, 11313365, 11485553, 11486000, 11733037, 11781095, 11889038, 11978179, 12150926, 12177059, 12374740, 12477932, 12573248, 12676647, 14500673, 14702039, 14718574, 14966024, 15489334, 15591305, 15678105, 16251192, 16344560, 16517405, 16737971, 17327236, 17683…	GO:0000155: two-component sensor activity, GO:0004740: pyruvate dehydrogenase (acetyl-transferring) kinase activity, GO:0005524: ATP binding, GO:0005739: mitochondrion, GO:0005759: mitochondrial matrix, GO:0005975: carbohydrate metabolic process, GO:0006006: glucose metabolic process, GO:0007165: signal transduction, GO:0007264: small GTPase mediated signal transduction, GO:0016740: transferase a…	04660: T cell receptor signaling pathway, 04664: Fc epsilon RI signaling pathway
8497_at	257	138	37	18	1.862	0.897	4.9e-05	PPFIA4	protein tyrosine phosphatase, receptor type, f polypeptide (PTPRF), interacting protein (liprin), alpha 4	8497	1	201286933	1q32.1	NA	Hs.153648	9624153, 10048485, 11931740, 12477932, 12629171, 12923177, 14612982, 14623284, 14702039, 16713569	GO:0005515: protein binding, GO:0005622: intracellular, GO:0005737: cytoplasm, GO:0009986: cell surface
2555_at	52	27	11	6	1.914	0.937	4.66e-05	GABRA2	gamma-aminobutyric acid (GABA) A receptor, alpha 2	2555	4	-45946338, -45946338	4p12	NA	Hs.116250	8175718, 8391122, 10023064, 10449790, 12477932, 14702039, 15024690, 15033447, 15274050, 15702134, 15834213, 15950776, 16080114, 16395124, 16557364, 16562401, 16622805, 16894595, 17207817, 17507911, 17655760, 17690794, 17949392, 17976953, 18005236, 18361719, 18482426, 18519829, 18727688, 18781239, 18818659, 19078961, 19086053	GO:0001505: regulation of neurotransmitter levels, GO:0004890: GABA-A receptor activity, GO:0005216: ion channel activity, GO:0005230: extracellular ligand-gated ion channel activity, GO:0005254: chloride channel activity, GO:0005886: plasma membrane, GO:0006811: ion transport, GO:0006821: chloride transport, GO:0006836: neurotransmitter transport, GO:0007214: gamma-aminobutyric acid signaling pa…	04080: Neuroactive ligand-receptor interaction
6513_at	5423	3008	976	515	1.803	0.85	2.64e-05	SLC2A1	solute carrier family 2 (facilitated glucose transporter), member 1	6513	1	-43163632	1p35-p31.3	NA	Hs.473721, Hs.706748	2394733, 2834252, 3028891, 3170580, 3839598, 7798206, 7829101, 8619474, 8662691, 8839927, 9110174, 9153243, 9462754, 10086067, 10198040, 10227690, 10562431, 10655495, 10759149, 10980529, 11007796, 11136715, 11168944, 11231353, 11296192, 11425315, 11477169, 11603379, 11681785, 11747430, 11774318, 11836704, 11842083, 11920478, 11953883, 11991658, 12064911, 12086959, 12112827, 12122099, 12133004, 12…	GO:0005215: transporter activity, GO:0005351: sugar:hydrogen symporter activity, GO:0005355: glucose transmembrane transporter activity, GO:0005515: protein binding, GO:0005622: intracellular, GO:0005624: membrane fraction, GO:0005737: cytoplasm, GO:0005886: plasma membrane, GO:0008643: carbohydrate transport, GO:0015758: glucose transport, GO:0016021: integral to membrane, GO:0016323: basolatera…	04920: Adipocytokine signaling pathway, 05211: Renal cell carcinoma
3485_at	2423	1108	855	367	2.168	1.117	1.57e-06	IGFBP2	insulin-like growth factor binding protein 2, 36kDa	3485	2	217206371	2q33-q34	NA	Hs.438102	1376411, 1380437, 1697583, 1710112, 1712312, 1714916, 1716260, 1726837, 2465304, 2479552, 7511544, 7680905, 8675597, 8781553, 9156044, 9408744, 10407151, 10912521, 11063745, 11297622, 12006706, 12102164, 12477932, 12519841, 12575534, 12672024, 12727212, 12794762, 12810534, 12839944, 12907597, 12955485, 14691340, 14710363, 14744083, 15147770, 15171717, 15489334, 15643522, 15651061, 15661050, 15686…	GO:0001558: regulation of cell growth, GO:0005576: extracellular region, GO:0005615: extracellular space, GO:0007165: signal transduction, GO:0031994: insulin-like growth factor I binding, GO:0031995: insulin-like growth factor II binding

## Sheet: 7d upregulated
ID	mean_H_7d	mean_N_7d	sd_H_7d	sd_N_7d	FC	logFC	P.Value	symbol	Description	Gene	Chromosome	Chromosome.Location	Cytoband	GenBank	UniGene	PubMed	Gene.Ontology	Pathway
144568_at	206	110	41	47	1.945	0.96	1.58525e-05	A2ML1	alpha-2-macroglobulin-like 1	144568	12	8866416	12p13.31	NA	Hs.620532	10737800, 12477932, 14702039, 16298998, 16344560, 17562024, 18648652	GO:0004867: serine-type endopeptidase inhibitor activity, GO:0005515: protein binding, GO:0005576: extracellular region, GO:0005615: extracellular space, GO:0017114: wide-spectrum protease inhibitor activity, GO:0052548: regulation of endopeptidase activity
80070_at	187	108	31	10	1.721	0.783	0.00428617	ADAMTS20	ADAM metallopeptidase with thrombospondin type 1 motif, 20	80070	12	-42034278	12q12	NA	Hs.287554	12514189, 12562771, 14702039	GO:0004222: metalloendopeptidase activity, GO:0005576: extracellular region, GO:0005578: proteinaceous extracellular matrix, GO:0005615: extracellular space, GO:0006508: proteolysis, GO:0008233: peptidase activity, GO:0008270: zinc ion binding, GO:0009967: positive regulation of signal transduction, GO:0030198: extracellular matrix organization, GO:0043066: negative regulation of apoptosis, GO:00…
114_at	195	86	67	17	2.229	1.157	1.05075e-05	ADCY8	adenylate cyclase 8 (brain)	114	8	-131861728	8q24	NA	Hs.591859	1427768, 1715695, 8076676, 8163524, 10075700, 10089566, 10807185, 10808179, 11076863, 11299302, 11457491, 11884542, 12477932, 12503609, 12626323, 12890691, 16258073, 16613843, 17586501, 18163389, 18480272, 19156168	GO:0000287: magnesium ion binding, GO:0005624: membrane fraction, GO:0005886: plasma membrane, GO:0006171: cAMP biosynthetic process, GO:0007611: learning or memory, GO:0008294: calcium- and calmodulin-responsive adenylate cyclase activity, GO:0009755: hormone-mediated signaling, GO:0016021: integral to membrane	00230: Purine metabolism, 04020: Calcium signaling pathway, 04540: Gap junction, 04720: Long-term potentiation, 04742: Taste transduction, 04912: GnRH signaling pathway, 04916: Melanogenesis
8862_at	229	144	58	3	1.558	0.64	0.00233183	APLN	apelin	8862	X	-128607005	Xq25-q26.3	NA	Hs.303084	9792798, 10525157, 10617103, 11040134, 11090199, 12477932, 12603839, 12798955, 12914775, 12963638, 12975309, 14702039, 15231996, 15489334, 15664671, 15677759, 15772651, 16115460, 16563531, 16723381, 17060400, 17128405, 17177135, 17412318, 17823846, 17826642, 17906101, 18272843, 18401529, 18484561, 18617693, 18772060, 18816630, 19100414, 19123778	GO:0005179: hormone activity, GO:0005576: extracellular region, GO:0006955: immune response, GO:0007165: signal transduction, GO:0007595: lactation
8553_at	432	186	96	29	2.303	1.203	0.000134619	BHLHE40	basic helix-loop-helix family, member e40	8553	3	4996096	3p26	NA	Hs.171825	9240428, 10449910, 11226878, 11278694, 11668339, 11688991, 12119049, 12297495, 12354771, 12384505, 12397359, 12477932, 12624110, 12754744, 15223310, 15489334, 15560782, 15719173, 15994878, 16169070, 16344560, 16487626, 16878149, 18228528, 18557763	GO:0003700: transcription factor activity, GO:0005515: protein binding, GO:0005634: nucleus, GO:0009649: entrainment of circadian clock, GO:0016564: transcription repressor activity, GO:0045892: negative regulation of transcription, DNA-dependent, GO:0048168: regulation of neuronal synaptic plasticity	04710: Circadian rhythm
284836_at	32	16	8	3	1.936	0.953	0.000433261	C21orf125	chromosome 21 open reading frame 125	284836	21	43694331	21q22.3	NA	Hs.146127	12477932, 14702039
401152_at	111	71	14	4	1.558	0.64	0.00755421	C4orf3	chromosome 4 open reading frame 3	401152	4	-120437021	4q26	NA	Hs.701808, Hs.718451	8889548, 12477932, 15146197, 16174453, 16344560	GO:0016020: membrane, GO:0016021: integral to membrane
153222_at	143	86	43	9	1.628	0.703	0.000388805	C5orf41	chromosome 5 open reading frame 41	153222	5	172415975	5q35.2	NA	Hs.484195	12477932, 14702039, 17353931, 18391022	GO:0005515: protein binding
9413_at	490	238	36	40	2.071	1.05	2.88954e-05	C9orf61	chromosome 9 open reading frame 61	9413	9	71129307, 71134060	9q13-q21	NA	Hs.118003	7951235, 12477932, 14702039, 15164053, 16189514, 16344560	GO:0016020: membrane, GO:0016021: integral to membrane
10344_at	246	149	24	36	1.682	0.75	0.00533267	CCL26	chemokine (C-C motif) ligand 26	10344	7	-75236777	7q11.23	NA	Hs.131342	9847074, 10373330, 10415065, 10488147, 11329013, 11425309, 11544308, 11748272, 12061839, 12192108, 12477932, 12689946, 12853948, 12975309, 15039444, 15207712, 15489334, 15521376, 15784470, 15863444, 16084752, 16264039, 16391516, 16453027, 16604488, 17073866, 17490641, 17541284, 17900656, 18055844, 18712274, 18774776, 18844613	GO:0005576: extracellular region, GO:0005615: extracellular space, GO:0006935: chemotaxis, GO:0006954: inflammatory response, GO:0006955: immune response, GO:0007165: signal transduction, GO:0007267: cell-cell signaling, GO:0008009: chemokine activity	04060: Cytokine-cytokine receptor interaction
1012_at	201	127	50	17	1.566	0.647	0.00253412	CDH13	cadherin 13, H-cadherin (heart)	1012	16	81218078	16q24.2-q24.3	NA	Hs.654386	2059658, 7982033, 8673923, 9468307, 9615235, 9650591, 9737784, 9852687, 10601632, 10737605, 11027617, 11326751, 11642747, 12060406, 12067979, 12177241, 12477932, 12489108, 12697869, 14579115, 14718574, 14729458, 14750164, 14997203, 15146197, 15210937, 15251938, 15292927, 15364621, 15489334, 15703273, 15816843, 15821437, 16013438, 16099944, 16133358, 16222700, 16273386, 16335952, 16344560, 1660270…	GO:0001938: positive regulation of endothelial cell proliferation, GO:0001954: positive regulation of cell-matrix adhesion, GO:0002040: sprouting angiogenesis, GO:0005509: calcium ion binding, GO:0005615: extracellular space, GO:0005737: cytoplasm, GO:0005886: plasma membrane, GO:0005901: caveola, GO:0007156: homophilic cell adhesion, GO:0007162: negative regulation of cell adhesion, GO:0007266: …
150384_at	49	28	4	7	1.823	0.867	0.00643937	CN5H6.4	hypothetical protein LOC150384	150384	22	-45069703	22q13.31	NA	Hs.348663	15461802, 16368877
1277_at	3505	2247	713	278	1.544	0.627	0.00384868	COL1A1	collagen, type I, alpha 1	1277	17	-45616455	17q21.33	NA	Hs.172928, Hs.681002	1303238, 1339453, 1377218, 1409674, 1460047, 1468447, 1511982, 1613761, 1634225, 1693626, 1715582, 1718984, 1730778, 1737847, 1770532, 1787829, 1870989, 1874719, 1895312, 1939261, 1939645, 1953667, 1988452, 1995349, 2010058, 2035536, 2036375, 2037280, 2116413, 2156854, 2169412, 2211725, 2295701, 2318855, 2339700, 2374517, 2446864, 2468670, 2470760, 2511192, 2745420, 2745554, 2767050, 2777764, 279…	GO:0001503: ossification, GO:0001568: blood vessel development, GO:0005201: extracellular matrix structural constituent, GO:0005576: extracellular region, GO:0005576: extracellular region, GO:0005581: collagen, GO:0005584: collagen type I, GO:0005886: plasma membrane, GO:0007584: response to nutrient, GO:0007601: visual perception, GO:0007605: sensory perception of sound, GO:0009612: response to …	01430: Cell junctions, 04510: Focal adhesion, 04512: ECM-receptor interaction
1281_at	425	261	161	36	1.551	0.633	0.00973709	COL3A1	collagen, type III, alpha 1	1281	2	189547343	2q31	NA	Hs.443625, Hs.708235	557335, 687591, 1352273, 1357232, 1370809, 1409674, 1466622, 1496983, 1672129, 1757960, 1895316, 1939638, 1979060, 2145268, 2235526, 2243125, 2349939, 2365710, 2446864, 2492273, 2579949, 2745554, 2764886, 2777083, 2780304, 2808425, 2834369, 2839553, 2981879, 3211760, 3357782, 3405773, 3571333, 3754462, 3858826, 6096827, 6246925, 6295694, 7016180, 7487954, 7546986, 7749417, 7833919, 7912131, 80195…	GO:0005178: integrin binding, GO:0005178: integrin binding, GO:0005201: extracellular matrix structural constituent, GO:0005515: protein binding, GO:0005576: extracellular region, GO:0005581: collagen, GO:0005586: collagen type III, GO:0005586: collagen type III, GO:0005615: extracellular space, GO:0005615: extracellular space, GO:0007160: cell-matrix adhesion, GO:0007179: transforming growth fac…	01430: Cell junctions, 04510: Focal adhesion, 04512: ECM-receptor interaction
7464_at	568	381	26	143	1.555	0.637	0.00231541	CORO2A	coronin, actin binding protein, 2A	7464	9	-99923079, -99923079	9q22.3	NA	Hs.113094	8889548, 8985118, 10231032, 12477932, 12628926, 14527417, 15489334, 16341674	GO:0003779: actin binding, GO:0005515: protein binding, GO:0007242: intracellular signaling cascade
3491_at	864	424	261	94	2.014	1.01	0.00151359	CYR61	cysteine-rich, angiogenic inducer, 61	3491	1	85819031	1p31-p22	NA	Hs.8867	8125298, 8635876, 9135077, 9373149, 9446626, 9488038, 9528960, 9536281, 9600969, 10446209, 10821835, 10852911, 11120741, 11287419, 11584015, 11600415, 11751417, 11810026, 11840342, 12036876, 12217894, 12364323, 12374462, 12444554, 12477932, 12736251, 12826661, 12831056, 12899698, 12939282, 14702039, 14988385, 15041728, 15044484, 15044605, 15053922, 15077166, 15389821, 15471875, 15489334, 15526358…	GO:0001558: regulation of cell growth, GO:0001569: patterning of blood vessels, GO:0005520: insulin-like growth factor binding, GO:0005576: extracellular region, GO:0006935: chemotaxis, GO:0007155: cell adhesion, GO:0008201: heparin binding, GO:0008283: cell proliferation, GO:0009653: anatomical structure morphogenesis
54541_at	1102	408	277	95	2.688	1.427	0.000215729	DDIT4	DNA-damage-inducible transcript 4	54541	10	73703682	10pter-q26.12	NA	Hs.523012	11076863, 11230166, 11256614, 11884613, 12453409, 12477932, 14646594, 15146197, 15180327, 15489336, 15592522, 15632201, 15988001, 16169070, 16258273, 16341674, 16381901, 16713569, 17005863, 17307335, 18796435, 18953439, 19114033	GO:0005622: intracellular, GO:0005737: cytoplasm, GO:0006915: apoptosis, GO:0009968: negative regulation of signal transduction	04150: mTOR signaling pathway
1843_at	510	272	217	65	1.786	0.837	0.00206711	DUSP1	dual specificity phosphatase 1	1843	5	-172127706	5q34	NA	Hs.171695	1406996, 7535770, 7806236, 8106404, 8168826, 8221888, 8389479, 8390041, 9571625, 9599409, 10617468, 11062068, 11278799, 11359773, 12080474, 12356755, 12391149, 12432554, 12477932, 12506119, 12765304, 12890671, 12947325, 12960255, 14551204, 14680833, 14702039, 14724291, 15059515, 15173070, 15247770, 15339908, 15448190, 15489334, 15569826, 15590693, 15614136, 15677475, 16044158, 16081065, 16224818,…	GO:0004726: non-membrane spanning protein tyrosine phosphatase activity, GO:0005515: protein binding, GO:0006470: protein amino acid dephosphorylation, GO:0006979: response to oxidative stress, GO:0007049: cell cycle, GO:0007242: intracellular signaling cascade, GO:0016787: hydrolase activity, GO:0017017: MAP kinase tyrosine/serine/threonine phosphatase activity	04010: MAPK signaling pathway
1910_at	655	317	451	205	2.037	1.027	0.000437262	EDNRB	endothelin receptor type B	1910	13	-77367616, -77367616	13q22	NA	Hs.82002	1282938, 1291713, 1648908, 1659806, 1710450, 1713452, 2175394, 7987295, 8001158, 8001160, 8429023, 8440682, 8630503, 8634719, 8810293, 8852658, 8852659, 8852660, 8982507, 9211925, 9261180, 9284755, 9359036, 9556633, 9760196, 10072757, 10090908, 10510297, 10528251, 10789830, 11376172, 11471546, 11565556, 11601839, 11829485, 11854280, 11891690, 11920632, 11930911, 11982704, 12117726, 12135322, 1218…	GO:0001600: endothelin-B receptor activity, GO:0001755: neural crest cell migration, GO:0004872: receptor activity, GO:0004930: G-protein coupled receptor activity, GO:0005515: protein binding, GO:0005886: plasma membrane, GO:0005887: integral to plasma membrane, GO:0006885: regulation of pH, GO:0007194: negative regulation of adenylate cyclase activity, GO:0007200: activation of phospholipase C …	04020: Calcium signaling pathway, 04080: Neuroactive ligand-receptor interaction, 04916: Melanogenesis
1958_at	779	353	294	36	2.109	1.077	5.26165e-05	EGR1	early growth response 1	1958	5	137829079	5q31.1	NA	Hs.326035	1090709, 1383501, 1411083, 1569051, 1702972, 2109185, 2110381, 2377485, 3127059, 3839394, 7624335, 8662759, 8668170, 9806899, 10049687, 10051405, 10079243, 10082522, 10409428, 10575214, 10671503, 10806043, 10849212, 11124866, 11251186, 11278640, 11795984, 11819815, 11830539, 11909874, 11925592, 11956220, 11978801, 12011097, 12065847, 12165491, 12235180, 12379479, 12384223, 12393577, 12433834, 124…	GO:0000122: negative regulation of transcription from RNA polymerase II promoter, GO:0003700: transcription factor activity, GO:0005622: intracellular, GO:0005634: nucleus, GO:0006355: regulation of transcription, DNA-dependent, GO:0007611: learning or memory, GO:0008270: zinc ion binding, GO:0016563: transcription activator activity, GO:0030217: T cell differentiation, GO:0045941: positive regul…
1993_at	280	184	63	27	1.512	0.597	0.00250946	ELAVL2	ELAV (embryonic lethal, abnormal vision, Drosophila)-like 2 (Hu antigen B)	1993	9	-23680102	9p21	NA	Hs.166109	7972035, 8158249, 8812435, 8907704, 10848602, 12477932, 15164053, 15489334, 15671036, 18607064	GO:0000166: nucleotide binding, GO:0003723: RNA binding, GO:0003730: mRNA 3-UTR binding, GO:0006355: regulation of transcription, DNA-dependent
22936_at	664	388	200	130	1.721	0.783	0.00154963	ELL2	elongation factor, RNA polymerase II, 2	22936	5	-95246557	5q15	NA	Hs.192221, Hs.708710	9108030, 11418481, 11752456, 12446457, 12477932, 15489334	GO:0003702: RNA polymerase II transcription factor activity, GO:0005634: nucleus, GO:0006350: transcription, GO:0006355: regulation of transcription, DNA-dependent, GO:0006368: RNA elongation from RNA polymerase II promoter, GO:0008023: transcription elongation factor complex
641737_at	631	373	134	105	1.709	0.773	8.1526e-05	FLJ44124	hypothetical LOC641737	641737	7		7p22.3	NA	Hs.655030
2353_at	297	178	77	1	1.628	0.703	0.00273798	FOS	v-fos FBJ murine osteosarcoma viral oncogene homolog	2353	14	74815283	14q24.3	NA	Hs.718415	1406655, 1545828, 1589769, 1631061, 1658710, 1827203, 1828107, 1903538, 2414012, 2511004, 2516827, 3027573, 3555978, 3817017, 6574479, 7540136, 7642615, 7665092, 7685215, 7713192, 7816143, 7816602, 7957556, 7962462, 7994752, 8065335, 8108109, 8151786, 8248197, 8380166, 8397339, 8440710, 8475068, 8480425, 8557686, 8570175, 8621941, 8628277, 8710853, 8737385, 8763994, 8816797, 8816798, 8904195, 897…	GO:0003690: double-stranded DNA binding, GO:0003700: transcription factor activity, GO:0003704: specific RNA polymerase II transcription factor activity, GO:0005634: nucleus, GO:0005667: transcription factor complex, GO:0006306: DNA methylation, GO:0006954: inflammatory response, GO:0007399: nervous system development, GO:0010843: promoter binding, GO:0031668: cellular response to extracellular s…	04010: MAPK signaling pathway, 04620: Toll-like receptor signaling pathway, 04660: T cell receptor signaling pathway, 04662: B cell receptor signaling pathway, 05210: Colorectal cancer
2555_at	46	30	8	6	1.566	0.647	0.00134429	GABRA2	gamma-aminobutyric acid (GABA) A receptor, alpha 2	2555	4	-45946338, -45946338	4p12	NA	Hs.116250	8175718, 8391122, 10023064, 10449790, 12477932, 14702039, 15024690, 15033447, 15274050, 15702134, 15834213, 15950776, 16080114, 16395124, 16557364, 16562401, 16622805, 16894595, 17207817, 17507911, 17655760, 17690794, 17949392, 17976953, 18005236, 18361719, 18482426, 18519829, 18727688, 18781239, 18818659, 19078961, 19086053	GO:0001505: regulation of neurotransmitter levels, GO:0004890: GABA-A receptor activity, GO:0005216: ion channel activity, GO:0005230: extracellular ligand-gated ion channel activity, GO:0005254: chloride channel activity, GO:0005886: plasma membrane, GO:0006811: ion transport, GO:0006821: chloride transport, GO:0006836: neurotransmitter transport, GO:0007214: gamma-aminobutyric acid signaling pa…	04080: Neuroactive ligand-receptor interaction
2591_at	622	379	61	16	1.64	0.713	0.00531491	GALNT3	UDP-N-acetyl-alpha-D-galactosamine:polypeptide N-acetylgalactosaminyltransferase 3 (GalNAc-T3)	2591	2	-166312558	2q24-q31	NA	Hs.170986	8663203, 9295285, 9394011, 9592121, 9884405, 12232759, 12477932, 12506059, 12708471, 14555840, 14735190, 15041730, 15133511, 15489334, 15860931, 16344560, 16638743, 16940445, 17351710, 17361208, 17853462, 18618993	GO:0004653: polypeptide N-acetylgalactosaminyltransferase activity, GO:0005509: calcium ion binding, GO:0005529: sugar binding, GO:0005624: membrane fraction, GO:0005794: Golgi apparatus, GO:0005975: carbohydrate metabolic process, GO:0016020: membrane, GO:0016021: integral to membrane, GO:0016757: transferase activity, transferring glycosyl groups, GO:0018242: protein amino acid O-linked glycosy…	00512: O-Glycan biosynthesis, 01030: Glycan structures - biosynthesis 1
353345_at	45	30	10	12	1.555	0.637	0.00403342	GPR141	G protein-coupled receptor 141	353345	7	37746520	7p14.1	NA	Hs.688230	12477932, 12679517, 12690205, 14623098, 15489334	GO:0004872: receptor activity, GO:0005886: plasma membrane, GO:0007165: signal transduction
348980_at	176	110	67	25	1.548	0.63	0.00355144	HCN1	hyperpolarization activated cyclic nucleotide-gated potassium channel 1	348980	5	-45295108	5p12	NA	Hs.650434	8889548, 9405696, 9630217, 9634236, 9921901, 11133998, 12034718, 12598605, 12668666, 12890777, 12928435, 14702039, 16382102, 17931874, 18081024, 18454440	GO:0000166: nucleotide binding, GO:0005244: voltage-gated ion channel activity, GO:0005249: voltage-gated potassium channel activity, GO:0005272: sodium channel activity, GO:0005515: protein binding, GO:0006811: ion transport, GO:0006813: potassium ion transport, GO:0006814: sodium ion transport, GO:0016020: membrane, GO:0016021: integral to membrane, GO:0030424: axon, GO:0030425: dendrite, GO:00…
23493_at	315	207	53	67	1.558	0.64	0.000665921	HEY2	hairy/enhancer-of-split related with YRPW motif 2	23493	6	126112424	6q21	NA	Hs.144287	10415358, 10692439, 10710309, 10860664, 10924525, 11095750, 11486044, 11486045, 12477932, 12535671, 12548545, 14574404, 15389319, 15489334, 15643620, 15680351, 16151017, 16165016, 16189514, 16293227, 16329098, 18239137, 18266235	GO:0003700: transcription factor activity, GO:0005634: nucleus, GO:0006355: regulation of transcription, DNA-dependent, GO:0007219: Notch signaling pathway, GO:0007275: multicellular organismal development, GO:0007399: nervous system development, GO:0009887: organ morphogenesis
3099_at	1053	617	156	54	1.697	0.763	0.000551427	HK2	hexokinase 2	3099	2	74913289	2p13	NA	Hs.406266, Hs.591588	7518342, 7622509, 7883120, 7883122, 7883123, 8250948, 8307259, 8567628, 8786021, 8889548, 9056853, 9278438, 9447955, 11068878, 11688991, 12477932, 12663490, 14672622, 14747281, 15489334, 15710218, 15967114, 16189514, 16396496, 16551620, 16713569, 17785433, 18271924, 18535403, 18772588	GO:0000166: nucleotide binding, GO:0004396: hexokinase activity, GO:0004396: hexokinase activity, GO:0005524: ATP binding, GO:0005739: mitochondrion, GO:0005741: mitochondrial outer membrane, GO:0005829: cytosol, GO:0006006: glucose metabolic process, GO:0006096: glycolysis, GO:0007595: lactation, GO:0016020: membrane, GO:0016301: kinase activity, GO:0016740: transferase activity, GO:0046835: car…	00010: Glycolysis / Gluconeogenesis, 00051: Fructose and mannose metabolism, 00052: Galactose metabolism, 00500: Starch and sucrose metabolism, 00530: Aminosugars metabolism
642546_at	238	157	10	5	1.512	0.597	0.0013422	HK2P	hexokinase 2 pseudogene	642546	X		Xq21.1	NA		7590357, 7999069
378465_at	115	56	63	5	1.888	0.917	0.00401301	HSN2	hereditary sensory neuropathy, type II	378465	12	847130	12p13.3	NA	Hs.656067, Hs.701055	4351257, 8889549, 12477932, 15060842, 15455397, 15911806, 16534117, 16541075, 16713569, 18521183	GO:0005576: extracellular region, GO:0048666: neuron development
3358_at	149	81	78	16	1.651	0.723	0.00615534	HTR2C	5-hydroxytryptamine (serotonin) receptor 2C	3358	X	113724806	Xq24	NA	Hs.149037	1302605, 1722404, 7557992, 7700379, 7895773, 8812491, 9153397, 9241279, 9537516, 9928237, 10206230, 10391209, 10581480, 10816555, 11140333, 11140838, 11150294, 11205431, 11300730, 11343611, 11502363, 11525423, 11526472, 11888546, 11916537, 11988167, 12006486, 12007749, 12086765, 12111480, 12145300, 12192608, 12425817, 12454564, 12477932, 12518270, 12627464, 12650852, 12668355, 12682077, 12707936,…	GO:0004872: receptor activity, GO:0004930: G-protein coupled receptor activity, GO:0004993: serotonin receptor activity, GO:0005515: protein binding, GO:0005634: nucleus, GO:0005737: cytoplasm, GO:0005886: plasma membrane, GO:0007165: signal transduction, GO:0007208: activation of phospholipase C activity by serotonin receptor signaling pathway, GO:0007268: synaptic transmission, GO:0007631: feed…	04020: Calcium signaling pathway, 04080: Neuroactive ligand-receptor interaction, 04540: Gap junction
3363_at	117	79	36	30	1.502	0.587	0.00124482	HTR7	5-hydroxytryptamine (serotonin) receptor 7 (adenylate cyclase-coupled)	3363	10	-92490557	10q21-q24	NA	Hs.73739	7601444, 7656980, 8226867, 8398139, 9084407, 9154233, 9298538, 10490701, 11163544, 11888546, 11906971, 11916537, 12446729, 12477932, 12767050, 14741325, 15086532, 15489334, 15581469, 15896881, 16192982, 16870886, 16935469, 17321075, 17406648, 17428232, 17936759, 18079067, 18243350, 18855532, 19086053, 19156168	GO:0004872: receptor activity, GO:0004930: G-protein coupled receptor activity, GO:0004993: serotonin receptor activity, GO:0005886: plasma membrane, GO:0005887: integral to plasma membrane, GO:0007165: signal transduction, GO:0007187: G-protein signaling, coupled to cyclic nucleotide second messenger, GO:0007268: synaptic transmission, GO:0007623: circadian rhythm, GO:0008015: blood circulation	04020: Calcium signaling pathway, 04080: Neuroactive ligand-receptor interaction
3485_at	3071	1518	659	349	2.028	1.02	4.46923e-06	IGFBP2	insulin-like growth factor binding protein 2, 36kDa	3485	2	217206371	2q33-q34	NA	Hs.438102	1376411, 1380437, 1697583, 1710112, 1712312, 1714916, 1716260, 1726837, 2465304, 2479552, 7511544, 7680905, 8675597, 8781553, 9156044, 9408744, 10407151, 10912521, 11063745, 11297622, 12006706, 12102164, 12477932, 12519841, 12575534, 12672024, 12727212, 12794762, 12810534, 12839944, 12907597, 12955485, 14691340, 14710363, 14744083, 15147770, 15171717, 15489334, 15643522, 15651061, 15661050, 15686…	GO:0001558: regulation of cell growth, GO:0005576: extracellular region, GO:0005615: extracellular space, GO:0007165: signal transduction, GO:0031994: insulin-like growth factor I binding, GO:0031995: insulin-like growth factor II binding
3553_at	144	85	49	11	1.632	0.707	0.00588869	IL1B	interleukin 1, beta	3553	2	-113303807	2q14	NA	Hs.126256	1548758, 1753956, 1835838, 1837236, 1905933, 1907279, 1918997, 1919001, 1919436, 1993354, 2001363, 2137098, 2372550, 2466831, 2536171, 2585509, 2602367, 2635664, 2898301, 2946959, 2954882, 2989698, 3259176, 3264123, 3281727, 3490654, 3493774, 6083565, 6209582, 7494249, 7511078, 7526541, 7561697, 7706435, 7797510, 7815507, 7818827, 7878046, 7981229, 8188271, 8383325, 8432529, 8537091, 8663297, 876…	GO:0000187: activation of MAPK activity, GO:0001660: fever, GO:0001934: positive regulation of protein amino acid phosphorylation, GO:0001934: positive regulation of protein amino acid phosphorylation, GO:0002711: positive regulation of T cell mediated immunity, GO:0005125: cytokine activity, GO:0005149: interleukin-1 receptor binding, GO:0005515: protein binding, GO:0005576: extracellular region…	04010: MAPK signaling pathway, 04060: Cytokine-cytokine receptor interaction, 04210: Apoptosis, 04620: Toll-like receptor signaling pathway, 04640: Hematopoietic cell lineage, 04940: Type I diabetes mellitus, 05010: Alzheimers disease, 05332: Graft-versus-host disease
3557_at	63	39	20	4	1.573	0.653	0.00852446	IL1RN	interleukin 1 receptor antagonist	3557	2	113591940, 113601608	2q14.2	NA	Hs.81134	1385987, 1386337, 1479000, 1534997, 1827201, 1828896, 1834644, 2137200, 2137201, 2139180, 2143761, 2147937, 7629520, 7867645, 8045306, 8175703, 8188271, 8432529, 8726668, 8852605, 8992991, 9062194, 9169134, 9514884, 9597123, 9710237, 9933103, 10443688, 10512743, 10625660, 10673296, 10744718, 10786823, 10860666, 10948677, 10988299, 11023482, 11027520, 11033452, 11045853, 11093146, 11127488, 111383…	GO:0005125: cytokine activity, GO:0005152: interleukin-1 receptor antagonist activity, GO:0005515: protein binding, GO:0005576: extracellular region, GO:0005615: extracellular space, GO:0005622: intracellular, GO:0005737: cytoplasm, GO:0006954: inflammatory response, GO:0006955: immune response, GO:0051384: response to glucocorticoid stimulus
3569_at	98	56	35	16	1.709	0.773	0.00357592	IL6	interleukin 6 (interferon, beta 2)	3569	7	22733342	7p21	NA	Hs.654458	1291290, 1346976, 1610348, 1656094, 1883960, 1918997, 2037043, 2261637, 2444978, 2472117, 2610854, 2680567, 2788034, 2789513, 2829354, 2906047, 3023045, 3130269, 3264880, 3266463, 3279116, 3294161, 3320204, 3491322, 3500852, 3538015, 3758081, 7494249, 7508917, 7511078, 7511596, 7523444, 7526541, 7536422, 7553888, 7595060, 7656270, 7693046, 7704970, 7803268, 7815507, 7831669, 7851440, 7986583, 801…	GO:0001781: neutrophil apoptosis, GO:0002384: hepatic immune response, GO:0002384: hepatic immune response, GO:0002446: neutrophil mediated immunity, GO:0002548: monocyte chemotaxis, GO:0002675: positive regulation of acute inflammatory response, GO:0002690: positive regulation of leukocyte chemotaxis, GO:0005125: cytokine activity, GO:0005138: interleukin-6 receptor binding, GO:0005576: extracel…	04060: Cytokine-cytokine receptor interaction, 04620: Toll-like receptor signaling pathway, 04630: Jak-STAT signaling pathway, 04640: Hematopoietic cell lineage, 05060: Prion disease, 05332: Graft-versus-host disease
3576_at	187	79	65	11	2.282	1.19	0.000180855	IL8	interleukin 8	3576	4	74825138	4q13-q21	NA	Hs.624	1281554, 1391327, 1639201, 1673289, 1840701, 1895676, 1988949, 2005614, 2007144, 2145175, 2170450, 2182630, 2184886, 2200751, 2212672, 2456256, 2523801, 2555418, 2648135, 2648569, 2655583, 2659722, 2663993, 2664463, 2681204, 2953813, 3057503, 3223947, 3260265, 3279957, 3322281, 3480540, 7673721, 7695626, 8077676, 8081002, 8381837, 8626516, 8631339, 8662698, 8663179, 8702798, 8995686, 9141135, 932…	GO:0001525: angiogenesis, GO:0005153: interleukin-8 receptor binding, GO:0005515: protein binding, GO:0005576: extracellular region, GO:0005615: extracellular space, GO:0006928: cell motion, GO:0006935: chemotaxis, GO:0006954: inflammatory response, GO:0006955: immune response, GO:0007050: cell cycle arrest, GO:0007186: G-protein coupled receptor protein signaling pathway, GO:0007242: intracellul…	04060: Cytokine-cytokine receptor interaction, 04620: Toll-like receptor signaling pathway, 05120: Epithelial cell signaling in Helicobacter pylori infection, 05219: Bladder cancer
51141_at	661	288	102	47	2.297	1.2	0.00144	INSIG2	insulin induced gene 2	51141	2	118562519	2q14.1	NA	Hs.7089	12242332, 12477932, 12482938, 12624180, 12842885, 14702039, 16549805, 16606821, 16614226, 17137505, 17428920, 17465681, 17471297, 17489846, 18003761, 18070740, 18162505, 18195716, 18223638, 18239574, 18270535, 18319320, 18347269, 18398047, 18426866, 18464289, 18514965, 18570692, 18615239, 18660489, 18682847, 18839134, 18989534, 19105843	GO:0005515: protein binding, GO:0005783: endoplasmic reticulum, GO:0005789: endoplasmic reticulum membrane, GO:0006629: lipid metabolic process, GO:0006991: response to sterol depletion, GO:0008202: steroid metabolic process, GO:0008203: cholesterol metabolic process, GO:0016020: membrane, GO:0016021: integral to membrane
3759_at	158	92	47	35	1.745	0.803	0.00589491	KCNJ2	potassium inwardly-rectifying channel, subfamily J, member 2	3759	17	65677270	17q23.1-q24.2	NA	Hs.1547	7590287, 7680768, 7696590, 7840300, 8821791, 9490857, 9533862, 10479680, 10559219, 10627592, 11181181, 11240146, 11287009, 11287423, 11371347, 11688996, 11809752, 12032359, 12045162, 12148092, 12163457, 12459783, 12598232, 12923176, 14500755, 14522976, 15024025, 15084602, 15304517, 15465033, 15618275, 15761194, 15795311, 15831539, 15922306, 15958527, 16258766, 16373386, 16382105, 16407206, 164191…	GO:0005244: voltage-gated ion channel activity, GO:0005515: protein binding, GO:0005887: integral to plasma membrane, GO:0006811: ion transport, GO:0006813: potassium ion transport, GO:0015272: ATP-activated inward rectifier potassium channel activity, GO:0016020: membrane, GO:0030955: potassium ion binding
3760_at	106	70	26	28	1.558	0.64	0.00415178	KCNJ3	potassium inwardly-rectifying channel, subfamily J, member 3	3760	2	155263338	2q24.1	NA	Hs.591606	8088798, 8804710, 8868049, 8929423, 9023358, 9108307, 9119365, 9765280, 9891030, 10889209, 11741896, 12034888, 12297500, 12458027, 12477932, 12743112, 15142872, 15489334, 16109170, 16382105, 18391953, 18498071	GO:0005244: voltage-gated ion channel activity, GO:0005515: protein binding, GO:0006811: ion transport, GO:0006813: potassium ion transport, GO:0008076: voltage-gated potassium channel complex, GO:0009897: external side of plasma membrane, GO:0015467: G-protein activated inward rectifier potassium channel activity, GO:0016020: membrane, GO:0016021: integral to membrane, GO:0030315: T-tubule, GO:0…
1316_at	365	209	110	36	1.701	0.767	0.00304889	KLF6	Kruppel-like factor 6	1316	10	-3811238	10p15	NA	Hs.4055, Hs.709396	9000136, 9083102, 9503030, 9685731, 9689109, 10802067, 11752579, 12433697, 12477932, 12508640, 12590140, 12651597, 12651626, 12740910, 12794452, 15057748, 15064720, 15067324, 15131018, 15164054, 15172998, 15247715, 15378003, 15486921, 15489334, 15735005, 15824733, 15917248, 15937668, 16044160, 16054710, 16169070, 16189514, 16431954, 16500425, 16598737, 16702959, 16778100, 16856969, 16872311, 1697…	GO:0003677: DNA binding, GO:0005622: intracellular, GO:0005634: nucleus, GO:0005737: cytoplasm, GO:0006350: transcription, GO:0008270: zinc ion binding, GO:0016563: transcription activator activity, GO:0019221: cytokine-mediated signaling pathway, GO:0030183: B cell differentiation, GO:0046872: metal ion binding
8609_at	265	145	83	26	1.794	0.843	0.00123779	KLF7	Kruppel-like factor 7 (ubiquitous)	8609	2	-207653773	2q32	NA	Hs.471221	9774444, 12477932, 14644156, 14702039, 14729953, 15937668, 16339272, 17164435, 19147600	GO:0003700: transcription factor activity, GO:0003713: transcription coactivator activity, GO:0005622: intracellular, GO:0005634: nucleus, GO:0006350: transcription, GO:0006357: regulation of transcription from RNA polymerase II promoter, GO:0007411: axon guidance, GO:0008270: zinc ion binding, GO:0045893: positive regulation of transcription, DNA-dependent, GO:0046872: metal ion binding, GO:0048…
337882_at	24	14	5	5	1.733	0.793	0.000780298	KRTAP19-1	keratin associated protein 19-1	337882	21	-30774234	21q22.1	NA	Hs.61552	10830953, 12359730	GO:0005882: intermediate filament
643812_at	81	49	14	17	1.725	0.787	0.0054159	KRTAP27-1	keratin associated protein 27-1	643812	21	-30631201	21q22.11	NA	Hs.580881		GO:0005882: intermediate filament
7044_at	743	430	179	161	1.769	0.823	0.00372498	LEFTY2	left-right determination factor 2	7044	1	-224190925	1q42.1	NA	Hs.520187	3457014, 9153275, 9230066, 9496783, 9665343, 10053005, 10886363, 10902804, 11100524, 12215426, 12477932, 12665591, 14702039, 15308665, 15536155, 16303743, 17038673	GO:0005125: cytokine activity, GO:0005160: transforming growth factor beta receptor binding, GO:0005576: extracellular region, GO:0005576: extracellular region, GO:0005615: extracellular space, GO:0007179: transforming growth factor beta receptor signaling pathway, GO:0007275: multicellular organismal development, GO:0007309: oocyte axis specification, GO:0008083: growth factor activity, GO:00160…	04350: TGF-beta signaling pathway
284194_at	149	71	61	14	2.009	1.007	0.00930736	LGALS9B	lectin, galactoside-binding, soluble, 9B	284194	17	-20293767	17p11.2	NA	Hs.462402, Hs.610820	11997339, 12477932, 16341674, 16344560	GO:0005529: sugar binding
100128019_at	116	55	35	34	2.567	1.36	0.00479259	LOC100128019	hypothetical LOC100128019	100128019	7		7p11.2	NA	Hs.650702
100128292_at	71	40	27	10	1.709	0.773	0.00942928	LOC100128292	hypothetical LOC100128292	100128292	10	79356575	10q22.3	NA	Hs.547908	8889548, 14702039
100128383_at	155	103	18	15	1.505	0.59	0.00371519	LOC100128383	hypothetical protein LOC100128383	100128383	11		11q13.1	NA	Hs.289019
100128679_at	229	142	60	5	1.576	0.657	0.00714355	LOC100128679	hypothetical protein LOC100128679	100128679	12		12q15	NA	Hs.133350
100128979_at	247	138	49	35	1.815	0.86	0.00423452	LOC100128979	hypothetical protein LOC100128979	100128979	15		15q22.2	NA	Hs.602995	14702039
100129581_at	90	58	8	4	1.544	0.627	0.00806043	LOC100129581	hypothetical LOC100129581	100129581	2		2p25.1	NA	Hs.640189
100129775_at	73	38	12	23	2.229	1.157	0.0026457	LOC100129775	hypothetical protein LOC100129775	100129775	11		11q13.5	NA	Hs.683867	14702039
100130226_at	295	151	48	17	1.95	0.963	0.00815412	LOC100130226	hypothetical protein LOC100130226	100130226	20		20q13.33	NA	Hs.517180
100130419_at	65	37	6	13	1.828	0.87	0.00994946	LOC100130419	hypothetical protein LOC100130419	100130419	19		19q13.32	NA	Hs.651773
100131102_at	311	167	32	53	1.932	0.95	0.00826015	LOC100131102	hypothetical protein LOC100131102	100131102	8		8q22.3	NA	Hs.654812, Hs.659563
100132388_at	96	52	11	4	1.832	0.873	0.00662649	LOC100132388	hypothetical protein LOC100132388	100132388	17		17q21.33	NA	Hs.700518
100132513_at	73	39	19	16	1.963	0.973	0.00992926	LOC100132513	hypothetical protein LOC100132513	100132513	11		11q23.2	NA	Hs.640212
100132782_at	46	15	18	5	2.928	1.55	0.000147346	LOC100132782	hypothetical protein LOC100132782	100132782	9		9q21.13	NA
100129834_at	626	423	76	133	1.53	0.613	0.00270008	LOC100133398	similar to Selenoprotein T	100129834	Un			NA
100130790_at	42	24	11	7	1.761	0.817	0.00426667	LOC100133429	hypothetical LOC100133429	100130790	Un			NA
100130977_at	46	21	21	5	2.028	1.02	0.00291553	LOC100133435	similar to melanoma antigen	100130977	2			NA
440338_at	682	442	77	133	1.58	0.66	0.00275073	LOC100133495	HERV-K_11q22.1 provirus ancestral Pol protein [Includes: Reverse transcriptase	440338	4			NA			GO:0003677: DNA binding, GO:0003723: RNA binding, GO:0003964: RNA-directed DNA polymerase activity, GO:0004519: endonuclease activity, GO:0004523: ribonuclease H activity, GO:0006278: RNA-dependent DNA replication, GO:0006310: DNA recombination, GO:0008270: zinc ion binding, GO:0008907: integrase activity, GO:0015074: DNA integration, GO:0016740: transferase activity, GO:0016779: nucleotidyltrans…
284276_at	94	52	13	6	1.79	0.84	0.00182515	LOC284276	hypothetical LOC284276	284276	18	72369599	18q23	NA	Hs.390287	12477932, 14702039
644794_at	209	105	45	56	2.224	1.153	0.000933179	LOC644794	hypothetical LOC644794	644794	7		7q11.21	NA
728027_at	17	10	6	1	1.587	0.667	0.00827421	LOC728027	hypothetical LOC728027	728027	10		10q23.1	NA
728908_at	43	21	15	4	1.982	0.987	0.00940922	LOC728908	similar to RhoGDI-1	728908	17			NA	Hs.612057
728969_at	161	106	29	61	1.729	0.79	0.0083461	LOC728969	similar to heparan sulfate 6-O-sulfotransferase 1	728969	1		1p36.12	NA	Hs.710292			00534: Heparan sulfate biosynthesis, 01030: Glycan structures - biosynthesis 1
729885_at	439	261	20	8	1.678	0.747	0.00372162	LOC729885	similar to pheromone receptor	729885	19		19q13.41	NA
729993_at	390	242	54	108	1.709	0.773	0.00013599	LOC729993	hypothetical protein LOC729993	729993	16	12902977, 12902977	16p13.12	NA	Hs.130661, Hs.578931	14702039
4023_at	204	120	46	36	1.729	0.79	0.000340975	LPL	lipoprotein lipase	4023	8	19840861	8p22	NA	Hs.180878	1281473, 1371284, 1400331, 1406652, 1479292, 1511985, 1521525, 1537564, 1576758, 1598907, 1619366, 1639392, 1674945, 1702428, 1730727, 1731801, 1737848, 1752947, 1907278, 1969408, 1975597, 2010533, 2038366, 2110364, 2121025, 2243796, 2294743, 2340307, 2349938, 2536938, 2701938, 3355847, 3515966, 3692485, 3823907, 7510694, 7592875, 7647785, 7686151, 7713910, 7806969, 7818530, 7906986, 7989348, 809…	GO:0004465: lipoprotein lipase activity, GO:0004620: phospholipase activity, GO:0004806: triacylglycerol lipase activity, GO:0005102: receptor binding, GO:0005319: lipid transporter activity, GO:0005576: extracellular region, GO:0005615: extracellular space, GO:0005886: plasma membrane, GO:0006644: phospholipid metabolic process, GO:0008201: heparin binding, GO:0010744: positive regulation of foa…	00561: Glycerolipid metabolism, 03320: PPAR signaling pathway, 05010: Alzheimers disease
167359_at	74	48	5	4	1.54	0.623	0.00418155	MGC42105	serine/threonine-protein kinase NIM1	167359	5	43228083	5p12	NA	Hs.25845	12477932, 14702039, 15489334, 15733851	GO:0000166: nucleotide binding, GO:0000287: magnesium ion binding, GO:0004674: protein serine/threonine kinase activity, GO:0005524: ATP binding, GO:0006468: protein amino acid phosphorylation, GO:0016740: transferase activity
4311_at	457	262	74	56	1.757	0.813	0.00727979	MME	membrane metallo-endopeptidase	4311	3	156280129, 156280398, 156280646, 156280772	3q25.1-q25.2	NA	Hs.307734	1660144, 2201681, 2417254, 2521237, 2521388, 2528730, 2531377, 2612455, 2736261, 2968607, 2971756, 2972276, 2984462, 2994530, 3157879, 3162217, 7532408, 8003005, 8168535, 8631021, 8687431, 8943850, 9232196, 9247159, 9313778, 9659899, 9857225, 10669592, 11104793, 11140838, 11170145, 11367540, 11849775, 11906289, 12070597, 12087466, 12102663, 12105192, 12140380, 12150966, 12203213, 12387451, 123937…	GO:0004222: metalloendopeptidase activity, GO:0005515: protein binding, GO:0005886: plasma membrane, GO:0005887: integral to plasma membrane, GO:0006508: proteolysis, GO:0007267: cell-cell signaling, GO:0008233: peptidase activity, GO:0008270: zinc ion binding, GO:0046872: metal ion binding	04614: Renin-angiotensin system, 04640: Hematopoietic cell lineage, 05010: Alzheimers disease
4493_at	1106	526	297	195	2.163	1.113	0.000562732	MT1E	metallothionein 1E	4493	16	55217085	16q13	NA	Hs.534330	2286373, 2581970, 3856101, 6089206, 6095291, 7932184, 8119276, 10774930, 11053642, 11133866, 11693492, 12477932, 12539042, 12556398, 14555400, 15489334, 15747776, 17244347, 18349110, 18724390	GO:0046872: metal ion binding
4495_at	5046	2832	230	1497	1.968	0.977	0.00172528	MT1G	metallothionein 1G	4495	16	-55258153	16q13	NA	Hs.433391	2286373, 2444457, 3023827, 3403543, 6089206, 8119276, 12477932, 12539042, 12640681, 12646258, 12970870, 15489334, 15735762, 15747776, 15862967, 18639284, 19137073	GO:0005507: copper ion binding, GO:0005515: protein binding, GO:0008270: zinc ion binding, GO:0046870: cadmium ion binding, GO:0046872: metal ion binding
4496_at	706	445	96	282	1.803	0.85	0.00925938	MT1H	metallothionein 1H	4496	16	55261226	16q13	NA	Hs.438462	1425708, 2286373, 8049263, 8119276, 8619255, 10774930, 11053642, 11093034, 12081484, 12477932, 12539042, 12646258, 12970870, 14668352, 15489334, 15747776	GO:0005507: copper ion binding, GO:0005515: protein binding, GO:0008270: zinc ion binding, GO:0046870: cadmium ion binding, GO:0046872: metal ion binding
4499_at	153	101	14	26	1.544	0.627	0.00363237	MT1M	metallothionein 1M	4499	16	55224034	16q13	NA	Hs.647370, Hs.656629	2286373, 8049263, 10575295, 10774930, 12477932, 12539042, 15489334, 17244347	GO:0005507: copper ion binding, GO:0008270: zinc ion binding, GO:0046870: cadmium ion binding, GO:0046872: metal ion binding
4502_at	2480	1297	351	629	2.047	1.033	0.00574383	MT2A	metallothionein 2A	4502	16	55199978	16q13	NA	Hs.647371	913597, 1339282, 1593628, 1633872, 2388267, 2780570, 3821726, 6323998, 6719135, 6896577, 7133118, 8766831, 10567918, 10716985, 10754528, 10766190, 12153718, 12192109, 12477932, 12539042, 12646258, 12714254, 12970870, 14530512, 14550308, 15041247, 15489334, 15541360, 15747776, 15862967, 16087360, 16166738, 16243847, 16341674, 16402917, 16518702, 16546755, 16916647, 16927099, 17224279, 17244347, 17…	GO:0005515: protein binding, GO:0006878: cellular copper ion homeostasis, GO:0008270: zinc ion binding, GO:0046872: metal ion binding
4609_at	707	329	114	54	2.149	1.103	2.8803e-06	MYC	v-myc myelocytomatosis viral oncogene homolog (avian)	4609	8	128817497	8q24.21	NA	Hs.202453	1318011, 1559612, 1597196, 1748630, 1914517, 2006410, 2430795, 2663470, 2834731, 3033665, 3243428, 3277717, 3540591, 3778453, 6298632, 6304538, 6304729, 6321164, 6324175, 6414718, 6419122, 6431612, 6547209, 6578511, 6714223, 7642555, 7651436, 7729426, 7838535, 7892279, 7957875, 8076603, 8220424, 8266081, 8377829, 8386367, 8668343, 8755740, 9129988, 9155018, 9184233, 9187264, 9207092, 9308237, 931…	GO:0001783: B cell apoptosis, GO:0001836: release of cytochrome c from mitochondria, GO:0003690: double-stranded DNA binding, GO:0003700: transcription factor activity, GO:0005515: protein binding, GO:0005634: nucleus, GO:0005737: cytoplasm, GO:0005819: spindle, GO:0006006: glucose metabolic process, GO:0006309: DNA fragmentation during apoptosis, GO:0006352: transcription initiation, GO:0006879:…	04010: MAPK signaling pathway, 04012: ErbB signaling pathway, 04310: Wnt signaling pathway, 04350: TGF-beta signaling pathway, 04630: Jak-STAT signaling pathway, 05210: Colorectal cancer, 05213: Endometrial cancer, 05216: Thyroid cancer, 05219: Bladder cancer, 05220: Chronic myeloid leukemia, 05221: Acute myeloid leukemia, 05222: Small cell lung cancer
10397_at	332	148	138	29	2.119	1.083	0.000580699	NDRG1	N-myc downstream regulated 1	10397	8	-134318595	8q24.3	NA	Hs.372914	8125298, 8841199, 8939898, 9251681, 9373149, 9605764, 9766676, 10395947, 10676663, 10831399, 11006124, 11237058, 11352569, 11835375, 11936845, 12046693, 12429530, 12432451, 12477932, 12483528, 12493777, 12702552, 12767066, 12872253, 12962147, 14702039, 14966915, 15247272, 15251988, 15302935, 15377670, 15461589, 15489334, 15582665, 15607035, 15867226, 15922294, 16169070, 16288478, 16314423, 163445…	GO:0005515: protein binding, GO:0005634: nucleus, GO:0005737: cytoplasm, GO:0005856: cytoskeleton, GO:0005886: plasma membrane, GO:0010038: response to metal ion, GO:0045576: mast cell activation
4884_at	314	163	93	10	1.883	0.913	0.000286107	NPTX1	neuronal pentraxin I	4884	17	-76055227	17q25.1-q25.2	NA	Hs.514556, Hs.702002	8884281, 10748068, 11239433, 12477932, 14702039, 15489334, 16115696, 16344560, 17151277	GO:0005509: calcium ion binding, GO:0006810: transport, GO:0007268: synaptic transmission, GO:0007417: central nervous system development, GO:0031410: cytoplasmic vesicle
203447_at	139	80	68	33	1.713	0.777	0.00126297	NRK	Nik related kinase	203447	X	104953191	Xq22.3	NA	Hs.209527	11076863, 11230166, 12477932, 12837278, 14702039, 15489334, 15489336, 15772651, 16381901	GO:0000166: nucleotide binding, GO:0003700: transcription factor activity, GO:0004674: protein serine/threonine kinase activity, GO:0005083: small GTPase regulator activity, GO:0005524: ATP binding, GO:0006468: protein amino acid phosphorylation, GO:0016740: transferase activity, GO:0045449: regulation of transcription
10178_at	81	52	16	6	1.551	0.633	0.00124351	ODZ1	odz, odd Oz/ten-m homolog 1(Drosophila)	10178	X	-123339503	Xq25	NA	Hs.23796, Hs.716649	9771704, 10331952, 10341219, 10556288, 10737800, 12000766, 12915301, 14702039, 15146197, 15772651, 15777793, 16344560	GO:0005576: extracellular region, GO:0005887: integral to plasma membrane, GO:0006955: immune response, GO:0007165: signal transduction, GO:0007399: nervous system development, GO:0008201: heparin binding, GO:0008285: negative regulation of cell proliferation, GO:0016020: membrane
390063_at	43	24	6	6	1.84	0.88	0.00568108	OR51I1	olfactory receptor, family 51, subfamily I, member 1	390063	11	-5418375	11p15.4	NA	Hs.553732	10220430, 11121057, 14983052	GO:0004872: receptor activity, GO:0004984: olfactory receptor activity, GO:0005886: plasma membrane, GO:0007165: signal transduction, GO:0007186: G-protein coupled receptor protein signaling pathway, GO:0007608: sensory perception of smell, GO:0016021: integral to membrane, GO:0050896: response to stimulus	04740: Olfactory transduction
57575_at	618	326	257	174	1.936	0.953	4.80403e-05	PCDH10	protocadherin 10	57575	4	134289919, 134289919	4q28.3	NA	Hs.192859	8012384, 10380929, 10716726, 10718198, 10817752, 10835267, 11230163, 11549318, 12477932, 16247458, 18644894, 19084528	GO:0005509: calcium ion binding, GO:0005515: protein binding, GO:0005886: plasma membrane, GO:0007155: cell adhesion, GO:0007156: homophilic cell adhesion, GO:0016021: integral to membrane
5155_at	197	122	51	2	1.58	0.66	0.00836038	PDGFB	platelet-derived growth factor beta polypeptide (simian sarcoma viral (v-sis) oncogene homolog)	5155	22	-37949632, -37949632	22q12.3-q13.1	NA	Hs.1976	287022, 291037, 1311092, 1317862, 1396586, 1661670, 1906887, 2212004, 2439522, 2536956, 2538439, 2544881, 2836953, 2845420, 2991848, 3023958, 3275870, 3456904, 3472769, 3517869, 3969118, 4033772, 6091919, 6297002, 6306471, 6318322, 6327048, 6329745, 6336312, 6740330, 6844921, 7073684, 7659502, 7896901, 8174076, 8697155, 8780057, 8889548, 8900172, 8988177, 9057949, 9334164, 9409235, 9685360, 96929…	GO:0001666: response to hypoxia, GO:0001938: positive regulation of endothelial cell proliferation, GO:0005161: platelet-derived growth factor receptor binding, GO:0005518: collagen binding, GO:0005576: extracellular region, GO:0005576: extracellular region, GO:0005737: cytoplasm, GO:0006929: substrate-bound cell migration, GO:0007179: transforming growth factor beta receptor signaling pathway, G…	04010: MAPK signaling pathway, 04060: Cytokine-cytokine receptor interaction, 04510: Focal adhesion, 04540: Gap junction, 04810: Regulation of actin cytoskeleton, 05211: Renal cell carcinoma, 05214: Glioma, 05215: Prostate cancer, 05218: Melanoma
5163_at	729	414	82	134	1.828	0.87	0.00526388	PDK1	pyruvate dehydrogenase kinase, isozyme 1	5163	2	173129024	2q31.1	NA	Hs.470633	7499431, 7864652, 9445476, 9512493, 9707564, 9748166, 10357815, 10480933, 10567431, 10748151, 10753910, 10896934, 10995762, 11222751, 11278835, 11313365, 11485553, 11486000, 11733037, 11781095, 11889038, 11978179, 12150926, 12177059, 12374740, 12477932, 12573248, 12676647, 14500673, 14702039, 14718574, 14966024, 15489334, 15591305, 15678105, 16251192, 16344560, 16517405, 16737971, 17327236, 17683…	GO:0000155: two-component sensor activity, GO:0004740: pyruvate dehydrogenase (acetyl-transferring) kinase activity, GO:0005524: ATP binding, GO:0005739: mitochondrion, GO:0005759: mitochondrial matrix, GO:0005975: carbohydrate metabolic process, GO:0006006: glucose metabolic process, GO:0007165: signal transduction, GO:0007264: small GTPase mediated signal transduction, GO:0016740: transferase a…	04660: T cell receptor signaling pathway, 04664: Fc epsilon RI signaling pathway
5210_at	526	259	7	41	2.051	1.037	0.000666232	PFKFB4	6-phosphofructo-2-kinase/fructose-2,6-biphosphatase 4	5210	3	-48530120	3p22-p21	NA	Hs.476217	8830046, 10095107, 12477932, 15474002, 15489334, 15642344, 15925437, 17143338	GO:0000166: nucleotide binding, GO:0003873: 6-phosphofructo-2-kinase activity, GO:0003873: 6-phosphofructo-2-kinase activity, GO:0004331: fructose-2,6-bisphosphate 2-phosphatase activity, GO:0005524: ATP binding, GO:0005829: cytosol, GO:0008152: metabolic process, GO:0016301: kinase activity, GO:0016740: transferase activity, GO:0016787: hydrolase activity	00051: Fructose and mannose metabolism
22822_at	1080	584	345	147	1.823	0.867	8.80781e-05	PHLDA1	pleckstrin homology-like domain, family A, member 1	22822	12	-74705493	12q15	NA	Hs.602085	9417904, 10894922, 11369516, 12384558, 12477932, 12738777, 15002043, 15037619, 15315823, 15489334, 16189514, 17211533, 17870236, 18641796	GO:0005515: protein binding, GO:0005634: nucleus, GO:0005737: cytoplasm, GO:0006915: apoptosis, GO:0016020: membrane, GO:0030659: cytoplasmic vesicle membrane, GO:0031410: cytoplasmic vesicle, GO:0045210: FasL biosynthetic process
5352_at	953	516	355	137	1.811	0.857	0.00373627	PLOD2	procollagen-lysine, 2-oxoglutarate 5-dioxygenase 2	5352	3	-147269917	3q23-q24	NA	Hs.477866	8889548, 9054364, 9271685, 10372558, 10701773, 10748089, 11334715, 11956192, 12477932, 12881513, 15174142, 15489334, 15523624, 15523625, 15589118, 15694128, 15955452, 16934803, 17353931	GO:0001666: response to hypoxia, GO:0005506: iron ion binding, GO:0005515: protein binding, GO:0005783: endoplasmic reticulum, GO:0006464: protein modification process, GO:0008475: procollagen-lysine 5-dioxygenase activity, GO:0016020: membrane, GO:0016491: oxidoreductase activity, GO:0016702: oxidoreductase activity, acting on single donors with incorporation of molecular oxygen, incorporation o…	00310: Lysine degradation
8497_at	304	160	24	16	1.901	0.927	3.49448e-05	PPFIA4	protein tyrosine phosphatase, receptor type, f polypeptide (PTPRF), interacting protein (liprin), alpha 4	8497	1	201286933	1q32.1	NA	Hs.153648	9624153, 10048485, 11931740, 12477932, 12629171, 12923177, 14612982, 14623284, 14702039, 16713569	GO:0005515: protein binding, GO:0005622: intracellular, GO:0005737: cytoplasm, GO:0009986: cell surface
5625_at	763	376	447	109	1.879	0.91	3.92383e-05	PRODH	proline dehydrogenase (oxidase) 1	5625	22	-17280293	22q11.21	NA	Hs.517352	7566098, 9305847, 9385373, 10192398, 11280728, 11891283, 12217952, 12477932, 12514185, 12525555, 12815738, 14702039, 15146197, 15274030, 15449943, 15489334, 15494707, 15662599, 15914462, 16094254, 16303758, 16619034, 16791139, 16860541, 16874462, 17106420, 17135275, 17412540, 17504246, 17604122, 18163391, 18197084, 18247315, 18794809, 18989458, 19140736	GO:0004657: proline dehydrogenase activity, GO:0005739: mitochondrion, GO:0005743: mitochondrial inner membrane, GO:0005759: mitochondrial matrix, GO:0006537: glutamate biosynthetic process, GO:0006562: proline catabolic process, GO:0008631: induction of apoptosis by oxidative stress, GO:0016491: oxidoreductase activity, GO:0055114: oxidation reduction	00330: Arginine and proline metabolism
5787_at	61	38	11	4	1.587	0.667	0.000496289	PTPRB	protein tyrosine phosphatase, receptor type, B	5787	12	-69196898, -69196898	12q15-q21	NA	Hs.434375	1373652, 1486802, 1645282, 2169617, 2170109, 7575486, 7628014, 9049255, 9118959, 9263011, 9584610, 10557082, 10706604, 10769382, 11313993, 12068634, 12234928, 12477932, 12615970, 12700241, 12907755, 14702039, 15144186, 15638728, 16344560, 17081983, 18361428	GO:0005001: transmembrane receptor protein tyrosine phosphatase activity, GO:0005515: protein binding, GO:0005887: integral to plasma membrane, GO:0006470: protein amino acid dephosphorylation, GO:0016020: membrane, GO:0016787: hydrolase activity	04520: Adherens junction
64284_at	644	331	382	259	2.095	1.067	9.63424e-05	RAB17	RAB17, member RAS oncogene family	64284	2	-238147703	2q37.3	NA	Hs.708264	8125298, 8486736, 9373149, 9624171, 10329441, 11076863, 11230166, 11256614, 12477932, 14702039, 15489334, 15489336, 15761153, 16169070, 16381901, 17353931	GO:0000166: nucleotide binding, GO:0005515: protein binding, GO:0005525: GTP binding, GO:0005622: intracellular, GO:0005886: plasma membrane, GO:0007264: small GTPase mediated signal transduction, GO:0015031: protein transport
55647_at	302	173	18	24	1.753	0.81	0.000428621	RAB20	RAB20, member RAS oncogene family	55647	13	-109973413	13q34	NA	Hs.508720	7706395, 11697911, 12477932, 14702039, 15489334, 16613320, 18649179	GO:0000166: nucleotide binding, GO:0005525: GTP binding, GO:0005794: Golgi apparatus, GO:0007264: small GTPase mediated signal transduction, GO:0015031: protein transport
391825_at	12	7	3	1	1.569	0.65	0.00573776	RPL23AP44	ribosomal protein L23a pseudogene 44	391825	5		5q23.1	NA		19123937
100132496_at	26	11	1	4	2.351	1.233	0.00338016	RPS24P9	ribosomal protein S24 pseudogene 9	100132496	3		3q21.2	NA		19123937
388076_at	97	58	16	15	1.701	0.767	0.00023725	RPS8P10	ribosomal protein S8 pseudogene 10	388076	15		15q11.2	NA	Hs.534012	19123937
6340_at	180	115	41	11	1.548	0.63	0.000185747	SCNN1G	sodium channel, nonvoltage-gated 1, gamma	6340	16	23101540	16p12	NA	Hs.371727	7490094, 7499195, 7550319, 7762608, 8521520, 8640238, 8824247, 8986818, 9169421, 9351815, 10391210, 10404817, 10642508, 10727408, 11180614, 11244092, 11463765, 11805112, 11845306, 11906720, 12107247, 12167593, 12473862, 12477932, 12548396, 14996668, 15188166, 15198480, 15328345, 15489334, 15596218, 15661075, 15702377, 15864129, 16172412, 16423824, 16463024, 16630545, 16716084, 17199078, 17241874,…	GO:0005216: ion channel activity, GO:0005515: protein binding, GO:0005886: plasma membrane, GO:0005887: integral to plasma membrane, GO:0006811: ion transport, GO:0006814: sodium ion transport, GO:0007588: excretion, GO:0015280: amiloride-sensitive sodium channel activity, GO:0016324: apical plasma membrane, GO:0031402: sodium ion binding, GO:0050699: WW domain binding, GO:0050896: response to st…	04742: Taste transduction
5055_at	197	85	92	19	2.149	1.103	0.00876802	SERPINB2	serpin peptidase inhibitor, clade B (ovalbumin), member 2	5055	18	59705918	18q21.3	NA	Hs.594481	1286667, 2161846, 2166055, 2303256, 2471561, 2494165, 2799763, 2845977, 3029122, 3257578, 3325828, 3496414, 7499264, 7506655, 7867722, 8152607, 8388810, 9268635, 9780231, 9846056, 9892694, 10368272, 10391209, 10393034, 10438806, 11929770, 11949838, 12105855, 12477932, 12578825, 12682008, 12883638, 12944478, 14653443, 15489334, 15500643, 15767426, 15887231, 16113755, 16214170, 16344560, 16459332, …	GO:0004252: serine-type endopeptidase activity, GO:0004867: serine-type endopeptidase inhibitor activity, GO:0005576: extracellular region, GO:0005737: cytoplasm, GO:0006916: anti-apoptosis
6495_at	140	89	17	17	1.591	0.67	0.00798641	SIX1	SIX homeobox 1	6495	14	-60181169	14q23.1	NA	Hs.716658	7720577, 8617500, 9770533, 10777717, 10801845, 10906137, 11734542, 12057921, 12215533, 12441302, 12477932, 12843324, 12874121, 14628042, 15123840, 15141091, 15226428, 15489334, 16189514, 16652090, 16670092, 17008870, 17130831, 17519359, 17637804, 18029348, 18330911, 18381426, 18398830, 18666230, 19101580	GO:0001658: ureteric bud branching, GO:0001759: induction of an organ, GO:0003700: transcription factor activity, GO:0005515: protein binding, GO:0005634: nucleus, GO:0005667: transcription factor complex, GO:0005730: nucleolus, GO:0005737: cytoplasm, GO:0006355: regulation of transcription, DNA-dependent, GO:0007389: pattern specification process, GO:0007517: muscle development, GO:0007519: skel…
9123_at	1351	737	186	248	1.888	0.917	0.000939515	SLC16A3	solute carrier family 16, member 3 (monocarboxylic acid transporter 4)	9123	17	77779581, 77780177, 77783432	17q25	NA	Hs.500761	8125298, 9373149, 9425115, 10510291, 10921872, 12477932, 12657613, 12739169, 15489334, 17081983, 17502341	GO:0005624: membrane fraction, GO:0005886: plasma membrane, GO:0005887: integral to plasma membrane, GO:0006810: transport, GO:0015293: symporter activity, GO:0015355: secondary active monocarboxylate transmembrane transporter activity, GO:0015711: organic anion transport, GO:0015718: monocarboxylic acid transport
6513_at	5716	2912	871	440	1.963	0.973	6.06178e-06	SLC2A1	solute carrier family 2 (facilitated glucose transporter), member 1	6513	1	-43163632	1p35-p31.3	NA	Hs.473721, Hs.706748	2394733, 2834252, 3028891, 3170580, 3839598, 7798206, 7829101, 8619474, 8662691, 8839927, 9110174, 9153243, 9462754, 10086067, 10198040, 10227690, 10562431, 10655495, 10759149, 10980529, 11007796, 11136715, 11168944, 11231353, 11296192, 11425315, 11477169, 11603379, 11681785, 11747430, 11774318, 11836704, 11842083, 11920478, 11953883, 11991658, 12064911, 12086959, 12112827, 12122099, 12133004, 12…	GO:0005215: transporter activity, GO:0005351: sugar:hydrogen symporter activity, GO:0005355: glucose transmembrane transporter activity, GO:0005515: protein binding, GO:0005622: intracellular, GO:0005624: membrane fraction, GO:0005737: cytoplasm, GO:0005886: plasma membrane, GO:0008643: carbohydrate transport, GO:0015758: glucose transport, GO:0016021: integral to membrane, GO:0016323: basolatera…	04920: Adipocytokine signaling pathway, 05211: Renal cell carcinoma
6617_at	198	119	18	10	1.655	0.727	0.00559491	SNAPC1	small nuclear RNA activating complex, polypeptide 1, 43kDa	6617	14	61298827	14q22	NA	Hs.179312	7715707, 8524284, 9003788, 9644240, 11056176, 11094070, 12477932, 12621023, 15489334, 15955816	GO:0003677: DNA binding, GO:0005634: nucleus, GO:0006350: transcription, GO:0006355: regulation of transcription, DNA-dependent
677835_at	425	222	94	48	1.919	0.94	8.47374e-05	SNORA56	small nucleolar RNA, H/ACA box 56	677835	X	153656466	Xq28	NA	Hs.660810	15199136, 16381836
100033444_at	24	10	7	2	2.292	1.197	0.000342356	SNORD115-7	small nucleolar RNA, C/D box 115-7	100033444	15	22978624	15q11.2	NA		11106375, 11726556, 12045206, 15565282, 15939761, 16357227
692233_at	521	278	217	113	1.857	0.893	0.002954	SNORD117	small nucleolar RNA, C/D box 117	692233	6	-31612129, -2950319, -2751777	6p21.33	NA		10684929
6696_at	1858	945	975	615	2.139	1.097	0.002864	SPP1	secreted phosphoprotein 1	6696	4	89115825	4q21-q25	NA	Hs.313	1107524, 1575754, 1729712, 1974876, 2404984, 2726470, 2736258, 2808373, 7522656, 7532190, 7592829, 7665163, 7837791, 7945249, 8195113, 8325891, 8535605, 8619474, 8663267, 8835534, 8910476, 9110174, 10593924, 10657301, 10698186, 10748043, 10751402, 10766759, 10835423, 11076863, 11375993, 11696986, 11721059, 11787071, 11801541, 11807984, 11825898, 11854181, 11861425, 11926891, 11928818, 11933203, 1…	GO:0001503: ossification, GO:0005125: cytokine activity, GO:0005515: protein binding, GO:0005576: extracellular region, GO:0005615: extracellular space, GO:0007155: cell adhesion	01430: Cell junctions, 04510: Focal adhesion, 04512: ECM-receptor interaction, 04620: Toll-like receptor signaling pathway
6781_at	940	461	191	143	2.08	1.057	0.000307933	STC1	stanniocalcin 1	6781	8	-23755378	8p21-p11.2	NA	Hs.25590	1458489, 7489828, 7892193, 8700837, 9480753, 9708804, 9794484, 10725397, 10947959, 11861508, 12223480, 12406069, 12477932, 12663264, 14500721, 14503913, 15062564, 15131261, 15149855, 15340161, 15383693, 15489334, 16109785, 16377640, 17032941, 17272771, 17395153, 17457011, 18164591, 18309109, 18355956, 18652825, 18786506	GO:0005179: hormone activity, GO:0005576: extracellular region, GO:0005615: extracellular space, GO:0006874: cellular calcium ion homeostasis, GO:0007166: cell surface receptor linked signal transduction, GO:0007267: cell-cell signaling, GO:0007584: response to nutrient
342898_at	68	38	10	14	1.836	0.877	0.00904285	SYCN	syncollin	342898	19	-44385401	19q13.2	NA	Hs.124123	11839820, 12477932	GO:0006887: exocytosis, GO:0016020: membrane, GO:0031410: cytoplasmic vesicle
6860_at	232	130	65	6	1.745	0.803	0.000297698	SYT4	synaptotagmin IV	6860	18	-39101854	18q12.3	NA	Hs.8059	7993622, 8058779, 8901523, 10397765, 10718198, 10734137, 10938284, 12477932, 15489334, 16189514, 19156168	GO:0005215: transporter activity, GO:0005509: calcium ion binding, GO:0005515: protein binding, GO:0006810: transport, GO:0007269: neurotransmitter secretion, GO:0008021: synaptic vesicle, GO:0016020: membrane, GO:0016021: integral to membrane, GO:0030054: cell junction, GO:0031410: cytoplasmic vesicle, GO:0043005: neuron projection, GO:0045202: synapse, GO:0048471: perinuclear region of cytoplasm
55357_at	307	155	28	12	1.977	0.983	8.6508e-05	TBC1D2	TBC1 domain family, member 2	55357	9	-100001101	9q22.33	NA	Hs.371016	11785977, 12477932, 15302935, 17081983, 19077034	GO:0005096: GTPase activator activity, GO:0005097: Rab GTPase activator activity, GO:0005622: intracellular, GO:0032313: regulation of Rab GTPase activity
7012_at	403	251	111	68	1.595	0.673	0.00331866	TERC	telomerase RNA component	7012	3	-170965091	3q26	NA	Hs.436182	7544491, 8602368, 9143511, 9546436, 10458601, 10591218, 10721988, 10973255, 10983983, 11511096, 11574891, 11788719, 11942411, 12083802, 12090986, 12135483, 12174094, 12384594, 12496479, 12507925, 12514136, 12525685, 12586348, 12661034, 12676774, 12918126, 12972604, 14532990, 14981093, 15098033, 15319288, 15329831, 15339688, 15381700, 15481329, 15613268, 15749017, 15753647, 15793301, 15849264, 159…
4071_at	152	84	76	24	1.659	0.73	0.00390983	TM4SF1	transmembrane 4 L six family member 1	4071	3	-150569494	3q21-q25	NA	Hs.715499	1565644, 7510285, 7829101, 8168850, 11102519, 11426942, 11739647, 11774983, 12477932, 12855661, 14702039, 15489334, 15812828, 16169070, 18270265	GO:0005887: integral to plasma membrane, GO:0016020: membrane
53840_at	84	53	5	11	1.602	0.68	0.00933982	TRIM34	tripartite motif-containing 34	53840	11	5597749, 5602810, 5610060	11p15	NA	Hs.125300	11013086, 11331580, 14702039, 16344560, 16775307, 16828831, 17156811	GO:0005515: protein binding, GO:0005622: intracellular, GO:0005737: cytoplasm, GO:0008270: zinc ion binding, GO:0046872: metal ion binding
7436_at	1530	760	163	194	2.047	1.033	2.90385e-05	VLDLR	very low density lipoprotein receptor	7436	9	2611792	9p24	NA	Hs.370422	7550352, 7592875, 7797576, 7828550, 8020981, 8069294, 8128315, 8294473, 9132912, 9555943, 9630508, 10380922, 10391209, 10571240, 10571241, 10629142, 10827173, 11266465, 11342683, 11931574, 12167620, 12169628, 12363388, 12477932, 12670700, 12824284, 12857919, 12899622, 14702039, 15064754, 15082773, 15164053, 15863833, 15950758, 15950998, 15953542, 16080122, 16384981, 17472347, 17854420, 17890782, …	GO:0004872: receptor activity, GO:0005041: low-density lipoprotein receptor activity, GO:0005319: lipid transporter activity, GO:0005509: calcium ion binding, GO:0005624: membrane fraction, GO:0005886: plasma membrane, GO:0005905: coated pit, GO:0006629: lipid metabolic process, GO:0006869: lipid transport, GO:0006897: endocytosis, GO:0007165: signal transduction, GO:0007399: nervous system devel…
55112_at	273	162	54	38	1.697	0.763	0.000162024	WDR60	WD repeat domain 60	55112	7	158342029	7q36.3	NA	Hs.389945	8889548, 12477932, 12690205, 14702039, 15489334, 16344560, 18391950
79698_at	219	143	47	26	1.53	0.613	0.000210383	ZMAT4	zinc finger, matrin type 4	79698	8	-40507272	8p11.21	NA	Hs.591850	12477932, 14702039, 17903298	GO:0003677: DNA binding, GO:0005622: intracellular, GO:0005634: nucleus, GO:0008270: zinc ion binding, GO:0046872: metal ion binding

## Sheet: 2h downregulated
ID	mean_H_2h	mean_N_2h	sd_H_2h	sd_N_2h	FC	logFC	P.Value	symbol	Description	Gene	Chromosome	Chromosome.Location	Cytoband	GenBank	UniGene	PubMed	Gene.Ontology	Pathway
27063_at	86	218	13	127	-2.229	-1.157	0.00660149	ANKRD1	ankyrin repeat domain 1 (cardiac muscle)	27063	10	-92661836	10q23.31	NA	Hs.448589	7730328, 11309420, 12054667, 12477932, 12524226, 12679596, 14583192, 15164054, 15489334, 15698842, 15805281, 16344560, 16450059, 17239933, 18273862, 18980987	GO:0003677: DNA binding, GO:0003714: transcription corepressor activity, GO:0005515: protein binding, GO:0005634: nucleus, GO:0005667: transcription factor complex, GO:0005737: cytoplasm, GO:0006357: regulation of transcription from RNA polymerase II promoter, GO:0006952: defense response, GO:0007165: signal transduction, GO:0031674: I band
100127909_at	11	21	2	6	-1.828	-0.87	0.00643255	LOC100127909	hypothetical protein LOC100127909	100127909	18		18q21.1	NA	Hs.637202

## Sheet: 24h downregulated
ID	mean_H_24h	mean_N_24h	sd_H_24h	sd_N_24h	FC	logFC	P.Value	symbol	Description	Gene	Chromosome	Chromosome.Location	Cytoband	GenBank	UniGene	PubMed	Gene.Ontology	Pathway
401913_at	32	63	6	15	-1.923	-0.943	0.00139684	LOC401913	hypothetical LOC401913	401913	19		19q13.11	NA
100129540_at	68	115	48	6	-1.982	-0.987	0.00315465	LOC100129540	hypothetical LOC100129540	100129540	15		15q25.1	NA	Hs.628768	14702039
100128170_at	23	52	10	11	-2.346	-1.23	0.00667434	LOC100128170	hypothetical protein LOC100128170	100128170	20		20q13.12	NA	Hs.711402
404636_at	224	359	76	70	-1.64	-0.713	0.000752939	FAM45A	family with sequence similarity 45, member A	404636	10	120853600	10q25	NA	Hs.434241	12477932, 14702039, 15489334
100131505_at	74	149	3	61	-1.91	-0.933	0.00772708	LOC100131505	hypothetical protein LOC100131505	100131505	17		17q25.3	NA	Hs.298351
100132938_at	39	70	25	13	-2.005	-1.003	0.00907195	LOC100132938	hypothetical LOC100132938	100132938	9		9q12	NA
144581_at	587	936	87	129	-1.595	-0.673	0.00275835	RPL14P1	ribosomal protein L14 pseudogene 1	144581	12		12q14.2	NA		19123937
100133208_at	80	132	21	30	-1.655	-0.727	0.0063119	LOC100133208	hypothetical protein LOC100133208	100133208	16		16q22.1	NA	Hs.711417
100132310_at	11	16	4	1	-1.54	-0.623	0.00713772	LOC100132310	similar to mCG5525	100132310	7		7q34	NA
120586_at	20	28	10	4	-1.516	-0.6	0.00811191	OR8I2	olfactory receptor, family 8, subfamily I, member 2	120586	11	55617359	11q11	NA	Hs.554524	12213199, 14983052	GO:0004872: receptor activity, GO:0004984: olfactory receptor activity, GO:0005886: plasma membrane, GO:0007165: signal transduction, GO:0007186: G-protein coupled receptor protein signaling pathway, GO:0007608: sensory perception of smell, GO:0016021: integral to membrane, GO:0050896: response to stimulus	04740: Olfactory transduction

## Sheet: 7d downregulated
ID	mean_H_7d	mean_N_7d	sd_H_7d	sd_N_7d	FC	logFC	P.Value	symbol	Description	Gene	Chromosome	Chromosome.Location	Cytoband	GenBank	UniGene	PubMed	Gene.Ontology	Pathway
19_at	196	311	44	118	-1.54	-0.623	0.0079216	ABCA1	ATP-binding cassette, sub-family A (ABC1), member 1	19	9	-106583104	9q31.1	NA	Hs.429294	7766993, 8088782, 9006906, 9731541, 10092505, 10431236, 10431237, 10431238, 10525055, 10533863, 10535983, 10706591, 10799318, 10884428, 10938021, 10970803, 11086027, 11162594, 11238261, 11257260, 11257261, 11279031, 11349008, 11352567, 11476961, 11476965, 11700048, 11719471, 11752403, 11785958, 11809185, 11855831, 11861672, 11864601, 11893753, 11929608, 11940086, 11950847, 12009425, 12032171, 120…	GO:0000166: nucleotide binding, GO:0005515: protein binding, GO:0005524: ATP binding, GO:0005543: phospholipid binding, GO:0005548: phospholipid transporter activity, GO:0005624: membrane fraction, GO:0005887: integral to plasma membrane, GO:0006810: transport, GO:0007040: lysosome organization, GO:0007186: G-protein coupled receptor protein signaling pathway, GO:0008202: steroid metabolic proces…	02010: ABC transporters - General
287_at	134	209	6	47	-1.53	-0.613	0.00807565	ANK2	ankyrin 2, neuronal	287	4	113958687, 114190233	4q25-q27	NA	Hs.620557	1830053, 1833308, 2968981, 7485162, 8253844, 9832558, 10579720, 11149946, 11449000, 11781319, 12477932, 12527750, 12571597, 14593108, 14657231, 14702039, 15075330, 15146197, 15178757, 15262991, 15310273, 15611082, 15647482, 15851119, 16253912, 16292983, 16864073, 17081983, 17161064, 17178715, 17242276, 17474147, 17940615, 18052691, 18275062, 18303017, 18782775, 18790697, 18832177	GO:0005515: protein binding, GO:0005737: cytoplasm, GO:0005856: cytoskeleton, GO:0007165: signal transduction
145173_at	58	92	8	20	-1.587	-0.667	0.00189675	B3GALTL	beta 1,3-galactosyltransferase-like	145173	13	30672111	13q12.3	NA	Hs.13205	12477932, 12943678, 14702039, 15057823, 15489334, 16344560, 16899492, 16909395, 17032646, 18199743, 18798333	GO:0005783: endoplasmic reticulum, GO:0005789: endoplasmic reticulum membrane, GO:0005975: carbohydrate metabolic process, GO:0006004: fucose metabolic process, GO:0016020: membrane, GO:0016021: integral to membrane, GO:0016757: transferase activity, transferring glycosyl groups
57102_at	68	114	6	7	-1.67	-0.74	0.00646342	C12orf4	chromosome 12 open reading frame 4	57102	12	-4467161	12p13.3	NA	Hs.302977	11062477, 12477932, 15489334
81556_at	332	506	44	45	-1.53	-0.613	0.00256994	C15orf44	chromosome 15 open reading frame 44	81556	15	-63658455, -63658170	15q22.31	NA	Hs.6686	11076863, 11230166, 11256614, 12477932, 15489336, 16381901	GO:0005737: cytoplasm
55028_at	179	268	40	40	-1.509	-0.593	0.00380764	C17orf80	chromosome 17 open reading frame 80	55028	17	68740370, 68740370	17q25.1	NA	Hs.12929	8889548, 11076863, 11230166, 12477932, 15489336, 16381901, 17213182	GO:0016020: membrane, GO:0016021: integral to membrane
65260_at	195	292	19	23	-1.502	-0.587	0.0018276	C1orf163	chromosome 1 open reading frame 163	65260	1	-52925101	1p32.3	NA	Hs.584966	9373149, 12477932, 14702039, 15489334	GO:0005488: binding
57002_at	177	292	44	8	-1.682	-0.75	0.00464561	C7orf36	chromosome 7 open reading frame 36	57002	7	39572533	7p14.1	NA	Hs.83313	9847074, 12477932, 12690205, 12853948, 15489334, 16169070
90693_at	89	136	8	27	-1.512	-0.597	0.00161386	CCDC126	coiled-coil domain containing 126	90693	7	23603522	7p15.3	NA	Hs.232296	9847074, 12477932, 12690205, 12975309	GO:0005576: extracellular region
10390_at	359	554	44	39	-1.548	-0.63	0.00392974	CEPT1	choline/ethanolamine phosphotransferase 1	10390	1	111483771, 111484355	1p13.3	NA	Hs.363572, Hs.636850	10191259, 12216837, 12477932, 14702039	GO:0000287: magnesium ion binding, GO:0004142: diacylglycerol cholinephosphotransferase activity, GO:0004307: ethanolaminephosphotransferase activity, GO:0005634: nucleus, GO:0005783: endoplasmic reticulum, GO:0005789: endoplasmic reticulum membrane, GO:0006629: lipid metabolic process, GO:0008654: phospholipid biosynthetic process, GO:0016020: membrane, GO:0016021: integral to membrane, GO:00167…
1690_at	344	647	110	311	-1.823	-0.867	0.000835795	COCH	coagulation factor C homolog, cochlin (Limulus polyphemus)	1690	14	30413491	14q12-q13	NA	Hs.21016	1910721, 7829101, 8417734, 8817345, 9441737, 9806553, 9931344, 10400989, 11295836, 11568667, 11574466, 11709536, 12477932, 12843317, 12928864, 12975309, 14501450, 14512963, 14718574, 15579465, 16835921, 16951386, 17264471, 17368553, 17561763, 17926100, 18312449, 19013156	GO:0005576: extracellular region, GO:0005578: proteinaceous extracellular matrix, GO:0007605: sensory perception of sound
1373_at	161	285	45	106	-1.733	-0.793	0.000517153	CPS1	carbamoyl-phosphate synthetase 1, mitochondrial	1373	2	211050653, 211129570, 211166334	2q35	NA	Hs.149252	1840546, 2517620, 7590739, 8486760, 9711878, 11407344, 11474210, 12477932, 12620389, 12655559, 12853138, 12955727, 14718356, 15146197, 15164414, 15342556, 15617192, 15715943, 17188582, 17597649	GO:0000050: urea cycle, GO:0000166: nucleotide binding, GO:0004087: carbamoyl-phosphate synthase (ammonia) activity, GO:0005515: protein binding, GO:0005524: ATP binding, GO:0005622: intracellular, GO:0005739: mitochondrion, GO:0006541: glutamine metabolic process, GO:0006807: nitrogen compound metabolic process, GO:0016874: ligase activity	00220: Urea cycle and metabolism of amino groups, 00251: Glutamate metabolism, 00330: Arginine and proline metabolism, 00910: Nitrogen metabolism
11056_at	228	407	74	80	-1.819	-0.863	0.00103597	DDX52	DEAD (Asp-Glu-Ala-Asp) box polypeptide 52	11056	17	-33046525	17q21.1	NA	Hs.590937	11124703, 11790298, 12429849, 12477932, 14702039, 15489334, 15635413, 16344560	GO:0000166: nucleotide binding, GO:0003723: RNA binding, GO:0004386: helicase activity, GO:0005524: ATP binding, GO:0005634: nucleus, GO:0008026: ATP-dependent helicase activity, GO:0016787: hydrolase activity	00790: Folate biosynthesis
3301_at	291	537	79	127	-1.857	-0.893	0.00097576	DNAJA1	DnaJ (Hsp40) homolog, subfamily A, member 1	3301	9	33015208	9p13-p12	NA	Hs.445203, Hs.707338	8334160, 8334161, 9192730, 9839446, 9915854, 10075921, 10816573, 10942430, 11147971, 11796717, 11809754, 12150907, 12477932, 12974469, 14667819, 14743216, 15082773, 15489334, 15592455, 15595953, 15635413, 15661747, 16169070, 16236267, 17353931, 18029348, 18684711	GO:0005737: cytoplasm, GO:0005856: cytoskeleton, GO:0006457: protein folding, GO:0006986: response to unfolded protein, GO:0007283: spermatogenesis, GO:0008270: zinc ion binding, GO:0016020: membrane, GO:0030317: sperm motility, GO:0030521: androgen receptor signaling pathway, GO:0031072: heat shock protein binding, GO:0046872: metal ion binding, GO:0050750: low-density lipoprotein receptor bindi…
80267_at	184	293	36	33	-1.606	-0.683	0.00420732	EDEM3	ER degradation enhancer, mannosidase alpha-like 3	80267	1	-182926247	1q24-q25	NA	Hs.523811	8125298, 9373149, 11318611, 12477932, 14702039, 15537790, 15579471, 16344560, 16431915, 16710414	GO:0004571: mannosyl-oligosaccharide 1,2-alpha-mannosidase activity, GO:0005509: calcium ion binding, GO:0005783: endoplasmic reticulum, GO:0005788: endoplasmic reticulum lumen, GO:0006986: response to unfolded protein, GO:0016020: membrane
51030_at	217	360	111	170	-1.753	-0.81	0.00412216	FAM18B	family with sequence similarity 18, member B	51030	17	18625306	17p11.2	NA	Hs.87295	10810093, 12477932, 15489334	GO:0016020: membrane, GO:0016021: integral to membrane
23767_at	156	504	143	400	-3.531	-1.82	1.88921e-06	FLRT3	fibronectin leucine rich transmembrane protein 3	23767	20	-14252642, -14252642	20p11	NA	Hs.41296	10644439, 10819331, 11780052, 12477932, 12975309, 14702039, 15489334, 16303743, 18593871	GO:0005057: receptor signaling protein activity, GO:0005578: proteinaceous extracellular matrix, GO:0005887: integral to plasma membrane, GO:0007155: cell adhesion, GO:0016020: membrane, GO:0030674: protein binding, bridging
2487_at	220	512	63	133	-2.335	-1.223	0.00447199	FRZB	frizzled-related protein	2487	2	-183406981	2qter	NA	Hs.128453	8824257, 9096311, 9118218, 9178261, 10728394, 12477932, 15210948, 15221014, 15340161, 15489334, 15818669, 16344560, 16889986, 17195216, 17237116, 17420170, 17600823, 17680269, 17702698, 18406176, 18451162, 19067193	GO:0001501: skeletal system development, GO:0005576: extracellular region, GO:0007275: multicellular organismal development, GO:0016020: membrane, GO:0030154: cell differentiation
10468_at	539	1344	92	474	-2.423	-1.277	5.99351e-05	FST	follistatin	10468	5	52812351	5q11.2	NA	Hs.9914	2036994, 3380788, 7887917, 8288705, 8536619, 8836491, 9799587, 9828086, 10411917, 10702675, 11232039, 11580864, 11948405, 12099690, 12242034, 12477932, 12514121, 12531697, 12651901, 12697670, 12702211, 12720540, 14563935, 14578849, 15064726, 15296481, 15340161, 15472207, 15489334, 16150905, 16198295, 16627583, 16935389, 17053951, 17284512, 17296189, 17347381, 17644811, 17893249, 18001154, 1818464…	GO:0000122: negative regulation of transcription from RNA polymerase II promoter, GO:0004871: signal transducer activity, GO:0005515: protein binding, GO:0007275: multicellular organismal development, GO:0051798: positive regulation of hair follicle development	04350: TGF-beta signaling pathway
8322_at	239	387	25	169	-1.533	-0.617	0.00494794	FZD4	frizzled homolog 4 (Drosophila)	8322	11	-86334368	11q14.2	NA	Hs.591968	1598965, 9707618, 10544037, 11401527, 12044878, 12067714, 12172548, 12477932, 12958364, 14737064, 15024691, 15195140, 15223780, 15370539, 15488808, 15489334, 15981244, 17093393, 17386109, 18156211, 18161623, 18787502, 19020754	GO:0004926: non-G-protein coupled 7TM receptor activity, GO:0004930: G-protein coupled receptor activity, GO:0005515: protein binding, GO:0007186: G-protein coupled receptor protein signaling pathway, GO:0007275: multicellular organismal development, GO:0016020: membrane, GO:0016021: integral to membrane, GO:0016055: Wnt receptor signaling pathway, GO:0042813: Wnt receptor activity	04310: Wnt signaling pathway, 04916: Melanogenesis, 05210: Colorectal cancer, 05217: Basal cell carcinoma
64785_at	133	234	19	43	-1.753	-0.81	0.000113293	GINS3	GINS complex subunit 3 (Psf3 homolog)	64785	16	56983798	16q21	NA	Hs.47125, Hs.605546	12477932, 12730134, 14702039, 15342556, 16344560, 16990792, 17127213, 17170760, 17417653, 17545466, 17557111, 17652513	GO:0005634: nucleus, GO:0006260: DNA replication
112937_at	162	289	71	161	-1.725	-0.787	0.00403891	GLB1L3	galactosidase, beta 1-like 3	112937	11	133651484	11q25	NA	Hs.436178	12477932, 14702039, 15489334, 16554811	GO:0004565: beta-galactosidase activity, GO:0005975: carbohydrate metabolic process, GO:0008152: metabolic process, GO:0009341: beta-galactosidase complex, GO:0016798: hydrolase activity, acting on glycosyl bonds, GO:0043169: cation binding
3037_at	875	1410	1041	1319	-1.95	-0.963	0.00605066	HAS2	hyaluronan synthase 2	3037	8	-122694451	8q24.12	NA	Hs.159226	8798477, 9169154, 10093717, 11790779, 12477932, 14636845, 14752026, 14988410, 15489334, 15642402, 15677552, 15722343, 15843373, 15922739, 16564133, 16603733, 16687630, 16786194, 16807238, 17307735, 17315194, 17611197, 17872502, 18587729, 19231585	GO:0005887: integral to plasma membrane, GO:0016020: membrane, GO:0016757: transferase activity, transferring glycosyl groups, GO:0050501: hyaluronan synthase activity
3052_at	242	397	61	98	-1.647	-0.72	0.00343487	HCCS	holocytochrome c synthase (cytochrome c heme-lyase)	3052	X	11039335	Xp22.3	NA	Hs.211571	8364577, 8661044, 9674913, 11827457, 12444108, 12477932, 14702039, 15489334, 16263763, 17033964, 17893649	GO:0004408: holocytochrome-c synthase activity, GO:0005506: iron ion binding, GO:0005739: mitochondrion, GO:0005743: mitochondrial inner membrane, GO:0009887: organ morphogenesis, GO:0016020: membrane, GO:0016829: lyase activity, GO:0046872: metal ion binding, GO:0055114: oxidation reduction	00860: Porphyrin and chlorophyll metabolism
57594_at	101	154	17	16	-1.526	-0.61	0.000978759	HOMEZ	homeobox and leucine zipper encoding	57594	14	-22812683	14q11.2	NA	Hs.632332	10718198, 11948623, 12477932, 12925734, 14702039, 15302935, 15489334	GO:0003700: transcription factor activity, GO:0005634: nucleus, GO:0006355: regulation of transcription, DNA-dependent, GO:0043565: sequence-specific DNA binding
10247_at	203	309	65	40	-1.562	-0.643	0.00782156	HRSP12	heat-responsive protein 12	10247	8	-99183742	8q22	NA	Hs.18426	8530410, 8973653, 9405234, 9463573, 9767104, 10400702, 10961346, 12477932, 14997576, 15489334, 16198412	GO:0004519: endonuclease activity, GO:0005634: nucleus, GO:0005737: cytoplasm, GO:0006449: regulation of translational termination, GO:0016787: hydrolase activity
64163_at	153	351	29	13	-2.329	-1.22	0.00159176	IFRG15	interferon responsive gene 15	64163	1	-178100538	1q25.2	NA	Hs.655655, Hs.716051	12477932
641516_at	130	227	45	97	-1.69	-0.757	0.00185503	KC6	keratoconus gene 6	641516	18	-37314233		NA	Hs.116612	15146197, 15790884
26128_at	395	616	101	44	-1.587	-0.667	0.00241384	KIAA1279	KIAA1279	26128	10	70418498	10q21.3	NA	Hs.279580	10574462, 12477932, 15164054, 15489334, 15883926, 16189514, 16225668, 16713569, 17353931	GO:0005515: protein binding, GO:0005739: mitochondrion, GO:0006839: mitochondrial transport, GO:0007275: multicellular organismal development, GO:0007399: nervous system development, GO:0019894: kinesin binding, GO:0030154: cell differentiation
151230_at	199	348	72	29	-1.815	-0.86	0.00897635	KLHL23	kelch-like 23 (Drosophila)	151230	2	170259246	2q31.1	NA	Hs.655150	10737800, 12477932, 14702039, 15489334, 16765319	GO:0005515: protein binding
56983_at	119	246	41	48	-2.124	-1.087	0.00162121	KTELC1	KTEL (Lys-Tyr-Glu-Leu) containing 1	56983	3	120670474	3q13.33	NA	Hs.231750	8125298, 9373149, 12477932, 12975309, 15342556, 15489334, 16303743, 16524674	GO:0005783: endoplasmic reticulum, GO:0005788: endoplasmic reticulum lumen
9836_at	136	221	52	51	-1.693	-0.76	0.00526011	LCMT2	leucine carboxyl methyltransferase 2	9836	15	-41407265	15q15.3	NA	Hs.200596	9628581, 10600115, 12477932, 12485877, 12853982, 15489334, 15813917, 16642040, 16830365, 17026958	GO:0005515: protein binding, GO:0008033: tRNA processing, GO:0008168: methyltransferase activity, GO:0016740: transferase activity	00150: Androgen and estrogen metabolism, 00340: Histidine metabolism, 00350: Tyrosine metabolism, 00380: Tryptophan metabolism, 00440: Aminophosphonate metabolism, 00450: Selenoamino acid metabolism
8549_at	124	294	126	395	-1.674	-0.743	0.00456473	LGR5	leucine-rich repeat-containing G protein-coupled receptor 5	8549	12	70120079	12q22-q23	NA	Hs.658889	9642114, 9849958, 10935549, 12477932, 12601349, 16575208, 17934449, 18372903, 18591388, 18688030, 19020323, 19020324, 19030762, 19139842	GO:0004872: receptor activity, GO:0005515: protein binding, GO:0005886: plasma membrane, GO:0005887: integral to plasma membrane, GO:0007165: signal transduction, GO:0007186: G-protein coupled receptor protein signaling pathway, GO:0016500: protein-hormone receptor activity
100128414_at	64	99	18	8	-1.602	-0.68	0.00744853	LOC100128414	similar to fibrinogen silencer binding protein	100128414	8		8q22.1	NA	Hs.710768
100132652_at	45	69	19	5	-1.636	-0.71	0.00776607	LOC100132652	hypothetical LOC100132652	100132652	6		6q14.3	NA
100132715_at	217	345	15	46	-1.587	-0.667	0.00343525	LOC100132715	similar to splicing factor, arginine/serine-rich 3	100132715	11		11p15.1	NA
100131093_at	102	169	19	41	-1.643	-0.717	0.000407752	LOC100133441	similar to UDP-GalNAc: polypeptide N-acetylgalactosaminyltransferase	100131093	12			NA
100133334_at	143	233	64	13	-1.725	-0.787	0.00491266	LOC100133469	hypothetical protein LOC100133469	100133334	14			NA	Hs.322826
80822_at	186	320	22	9	-1.729	-0.79	0.000220516	LOC100133541	hypothetical LOC100133541	80822	Un			NA
728715_at	84	252	9	111	-2.802	-1.487	0.00053464	LOC728715	similar to hCG38149	728715	12		12p13.31	NA	Hs.434604
730126_at	37	60	12	4	-1.686	-0.753	0.0050955	LOC730126	hypothetical LOC730126	730126	15		15q25.1	NA	Hs.671650
85390_at	229	378	5	145	-1.58	-0.66	0.00445777	LOC85390	RNA, small nucleolar	85390	11	-122434748	11q23.3-q25	NA	Hs.690635	2251119, 3037489, 7545947
9440_at	185	311	48	39	-1.709	-0.773	0.000809144	MED17	mediator complex subunit 17	9440	11	93157052	11q14	NA	Hs.444931	8710870, 9989412, 10198638, 10235266, 10235267, 11504724, 11867769, 12037571, 12101254, 12154023, 12218053, 12477932, 12509459, 12584197, 14576168, 14636573, 14638676, 14702039, 15175163, 15208681, 15489334, 16109376, 16344560	GO:0000119: mediator complex, GO:0004872: receptor activity, GO:0005515: protein binding, GO:0005634: nucleus, GO:0005667: transcription factor complex, GO:0006350: transcription, GO:0006367: transcription initiation from RNA polymerase II promoter, GO:0016455: RNA polymerase II transcription mediator activity, GO:0030374: ligand-dependent nuclear receptor transcription coactivator activity, GO:0…
407975_at	302	644	142	347	-2.08	-1.057	0.00689818	MIRHG1	microRNA host gene 1 (non-protein coding)	407975	13		13q31.3	NA	Hs.24115, Hs.652877	11991713, 12477932, 14702039, 15126345, 15944707, 15944709, 16077067, 16266980, 17210683
4488_at	72	117	8	48	-1.555	-0.637	0.00395895	MSX2	msh homeobox 2	4488	5	174084180	5q34-q35	NA	Hs.89404	7687426, 7726844, 7897272, 8101453, 8106171, 8668339, 8786091, 8968743, 9073066, 9111364, 9256341, 9265625, 9373945, 9522127, 10451362, 10742103, 10767351, 10831122, 11084035, 11683913, 11763998, 11959851, 12145306, 12145307, 12145310, 12407713, 12477932, 12750290, 12925529, 14571277, 14679154, 15060165, 15489334, 16327884, 16425399, 16467978, 16540516, 16642368, 17693062, 18029348, 18056036, 181…	GO:0001501: skeletal system development, GO:0003007: heart morphogenesis, GO:0003700: transcription factor activity, GO:0005515: protein binding, GO:0005634: nucleus, GO:0005737: cytoplasm, GO:0006355: regulation of transcription, DNA-dependent, GO:0007275: multicellular organismal development, GO:0008285: negative regulation of cell proliferation, GO:0030326: embryonic limb morphogenesis, GO:003…
221143_at	80	123	12	17	-1.53	-0.613	0.00210358	N6AMT2	N-6 adenine-specific DNA methyltransferase 2 (putative)	221143	13	-20201072	13q12.11	NA	Hs.26674	12477932, 14702039, 18390568	GO:0003676: nucleic acid binding, GO:0008168: methyltransferase activity, GO:0016740: transferase activity, GO:0032259: methylation
57727_at	181	346	57	71	-1.954	-0.967	0.000242378	NCOA5	nuclear receptor coactivator 5	57727	20	-44123032	20q12-q13.12	NA	Hs.654991	10997877, 11113208, 11780052, 12477932, 15073177, 15146197, 16094384, 17081983	GO:0004812: aminoacyl-tRNA ligase activity, GO:0005524: ATP binding, GO:0005634: nucleus, GO:0006350: transcription, GO:0006355: regulation of transcription, DNA-dependent, GO:0006412: translation
51103_at	84	136	9	23	-1.613	-0.69	0.00305453	NDUFAF1	NADH dehydrogenase (ubiquinone) 1 alpha subcomplex, assembly factor 1	51103	15	-39466842	15q11.2-q21.3	NA	Hs.106529	9769214, 10810093, 11935339, 12477932, 15489334, 16189514, 16218961, 17344420, 17353931, 17383918, 17557076	GO:0005739: mitochondrion, GO:0005747: mitochondrial respiratory chain complex I, GO:0006120: mitochondrial electron transport, NADH to ubiquinone, GO:0006461: protein complex assembly, GO:0051082: unfolded protein binding
81831_at	201	392	51	51	-1.977	-0.983	0.00382514	NETO2	neuropilin (NRP) and tolloid (TLL)-like 2	81831	16	-45672942	16q11	NA	Hs.444046	11943477, 12477932, 12975309, 14702039, 15340161, 15489334	GO:0004872: receptor activity, GO:0016020: membrane, GO:0016021: integral to membrane
51388_at	331	494	71	28	-1.512	-0.597	0.00120713	NIP7	nuclear import 7 homolog (S. cerevisiae)	51388	16	67931046	16q22.1	NA	Hs.585728	10810093, 11042152, 12417987, 12429849, 12477932, 14660641, 14702039, 15489334, 15522784, 15635413, 16189514, 16341674, 17643419	GO:0003723: RNA binding, GO:0005515: protein binding, GO:0005634: nucleus, GO:0042255: ribosome assembly
128414_at	161	241	59	81	-1.519	-0.603	0.00469817	NKAIN4	Na+/K+ transporting ATPase interacting 4	128414	20	-61342583	20q13.33	NA	Hs.46627	8125298, 9373149, 11780052, 12477932, 15489334, 17606467	GO:0005886: plasma membrane, GO:0016021: integral to membrane
4922_at	322	508	388	452	-1.954	-0.967	0.00594793	NTS	neurotensin	4922	12	84792205	12q21	NA	Hs.80962	409699, 1436492, 3525564, 3670596, 6754769, 7791794, 7836437, 8075503, 8719037, 8770919, 8869556, 8954810, 9530155, 9756851, 11278902, 11559354, 11801734, 11811984, 11815627, 11906607, 11912133, 11922768, 12150975, 12473660, 12477932, 12531461, 12609826, 14699144, 14743366, 15123666, 15358593, 15489334, 15623535, 16087676, 16519961, 16984735, 17068197, 17289170, 17570131, 17644423, 17870207, 1804…	GO:0005184: neuropeptide hormone activity, GO:0005576: extracellular region, GO:0005625: soluble fraction, GO:0007165: signal transduction, GO:0031410: cytoplasmic vesicle, GO:0050880: regulation of blood vessel size
5080_at	55	118	20	98	-1.79	-0.84	0.00377529	PAX6	paired box 6	5080	11	-31762915, -31762915	11p13	NA	Hs.270303, Hs.502235, Hs.611376, Hs.715523, Hs.715646, Hs.716008	1302030, 1345175, 1684738, 7065945, 7550230, 7666404, 7668281, 7698003, 7757816, 7909985, 7951315, 7958875, 8111379, 8162071, 8364574, 8640214, 8889548, 9056723, 9138149, 9147640, 9281415, 9482572, 9538891, 9792406, 9856761, 9931324, 10234503, 10346815, 10359315, 10441571, 10506141, 10610023, 10747901, 10955655, 11036080, 11069920, 11309364, 11350962, 11358870, 11850181, 12043047, 12107410, 12107…	GO:0001654: eye development, GO:0003700: transcription factor activity, GO:0005515: protein binding, GO:0005634: nucleus, GO:0006355: regulation of transcription, DNA-dependent, GO:0007275: multicellular organismal development, GO:0007417: central nervous system development, GO:0007601: visual perception, GO:0009887: organ morphogenesis, GO:0030154: cell differentiation, GO:0043565: sequence-spec…	04950: Maturity onset diabetes of the young
51585_at	278	485	125	68	-1.845	-0.883	0.00462657	PCF11	PCF11, cleavage and polyadenylation factor subunit, homolog (S. cerevisiae)	51585	11	82545784	11q13	NA	Hs.128959	10048485, 11060040, 12226669, 12477932, 15302935, 15489334, 16344560, 17081983, 17606639, 18086705	GO:0000398: nuclear mRNA splicing, via spliceosome, GO:0005634: nucleus, GO:0005849: mRNA cleavage factor complex, GO:0006379: mRNA cleavage
5354_at	738	1153	239	448	-1.544	-0.627	0.00815022	PLP1	proteolipid protein 1	5354	X	102918094, 102918409	Xq22	NA	Hs.1787	1376966, 1384324, 1707231, 1708672, 1711121, 1715570, 2441695, 2449536, 2467009, 2479017, 2480601, 2773936, 3457761, 3467339, 3768366, 3840606, 4041237, 6083474, 6201756, 7522741, 7531827, 7539213, 7541731, 7573159, 7679906, 7683951, 7684886, 7684945, 8012387, 8696336, 8765335, 8780101, 8909455, 8956049, 9008538, 9143933, 9247276, 9489796, 9633722, 9728768, 9747038, 9788732, 9858696, 9894878, 993…	GO:0005515: protein binding, GO:0007229: integrin-mediated signaling pathway, GO:0007268: synaptic transmission, GO:0010001: glial cell differentiation, GO:0016020: membrane, GO:0016021: integral to membrane, GO:0019911: structural constituent of myelin sheath, GO:0022010: myelination in the central nervous system, GO:0042759: long-chain fatty acid biosynthetic process, GO:0043218: compact myelin…
10714_at	197	319	31	76	-1.595	-0.673	0.00546994	POLD3	polymerase (DNA-directed), delta 3, accessory subunit	10714	11	73981276	11q14	NA	Hs.82502	7584026, 7584028, 7910606, 9099749, 9111189, 10219083, 10559261, 10852724, 11473323, 11595739, 12171929, 12477932, 16000169, 16510448, 16934752, 16935576, 17081983, 17932049, 18157942, 18765914, 18818516	GO:0000731: DNA synthesis during DNA repair, GO:0003887: DNA-directed DNA polymerase activity, GO:0005515: protein binding, GO:0005634: nucleus, GO:0005654: nucleoplasm, GO:0006297: nucleotide-excision repair, DNA gap filling, GO:0006298: mismatch repair, GO:0016740: transferase activity, GO:0016779: nucleotidyltransferase activity, GO:0043625: delta DNA polymerase complex	00230: Purine metabolism, 00240: Pyrimidine metabolism, 03030: DNA replication, 03410: Base excision repair, 03420: Nucleotide excision repair, 03430: Mismatch repair, 03440: Homologous recombination
55703_at	128	203	34	29	-1.617	-0.693	0.00171349	POLR3B	polymerase (RNA) III (DNA directed) polypeptide B	55703	12	105275618	12q23.3	NA	Hs.610795, Hs.62696	1403646, 12391170, 12477932, 14702039, 15489334, 17903297, 18044988	GO:0003677: DNA binding, GO:0003899: DNA-directed RNA polymerase activity, GO:0005634: nucleus, GO:0006350: transcription, GO:0008270: zinc ion binding, GO:0016740: transferase activity, GO:0016779: nucleotidyltransferase activity, GO:0032549: ribonucleoside binding, GO:0046872: metal ion binding	00230: Purine metabolism, 00240: Pyrimidine metabolism, 03020: RNA polymerase
5718_at	359	560	79	89	-1.573	-0.653	0.00940891	PSMD12	proteasome (prosome, macropain) 26S subunit, non-ATPase, 12	5718	17	-62767081, -62767080	17q24.2	NA	Hs.646575	1317798, 8125298, 8811196, 9079628, 9373149, 9426256, 9811770, 9846577, 10893419, 11285280, 12167863, 12419264, 12477932, 12665801, 12719574, 12750511, 12791267, 12808465, 12808466, 12809610, 12830140, 12840737, 12859895, 12914693, 12920286, 12970355, 14527406, 14528300, 14528301, 14550573, 14557625, 14564014, 14614829, 14702039, 14743216, 15029244, 15489334, 16501559, 17353931	GO:0005515: protein binding, GO:0005829: cytosol, GO:0005838: proteasome regulatory particle, GO:0031145: anaphase-promoting complex-dependent proteasomal ubiquitin-dependent protein catabolic process, GO:0051436: negative regulation of ubiquitin-protein ligase activity during mitotic cell cycle, GO:0051437: positive regulation of ubiquitin-protein ligase activity during mitotic cell cycle	03050: Proteasome
10137_at	338	653	91	125	-1.959	-0.97	0.000800774	RBM12	RNA binding motif protein 12	10137	20	-33700292	20q11.21	NA	Hs.246413	9853615, 9872452, 11435693, 11780052, 12168954, 12421765, 12477932, 14702039, 15144186, 15489334, 16120600, 17081983, 18831769	GO:0000166: nucleotide binding, GO:0003723: RNA binding, GO:0005515: protein binding, GO:0005634: nucleus
5983_at	392	600	77	103	-1.533	-0.617	0.00909791	RFC3	replication factor C (activator 1) 3, 38kDa	5983	13	33290205, 33290205	13q12.3-q13	NA	Hs.115474	7774928, 8125298, 8441605, 8692848, 9092549, 9111189, 9121429, 9228079, 9373149, 9488738, 9822671, 10051561, 10884395, 11572977, 11907025, 12171929, 12192049, 12477932, 12766176, 12930902, 14605214, 14702039, 15489334, 15635413, 16344560, 17456004	GO:0000166: nucleotide binding, GO:0000731: DNA synthesis during DNA repair, GO:0003689: DNA clamp loader activity, GO:0005515: protein binding, GO:0005634: nucleus, GO:0005654: nucleoplasm, GO:0005663: DNA replication factor C complex, GO:0005663: DNA replication factor C complex, GO:0006271: DNA strand elongation during DNA replication, GO:0006297: nucleotide-excision repair, DNA gap filling, G…	03030: DNA replication, 03420: Nucleotide excision repair, 03430: Mismatch repair
51136_at	61	101	10	26	-1.625	-0.7	0.00302742	RNFT1	ring finger protein, transmembrane 1	51136	17	-55384504	17q23.1	NA	Hs.531701	12477932	GO:0005515: protein binding, GO:0008270: zinc ion binding, GO:0016020: membrane, GO:0016021: integral to membrane, GO:0046872: metal ion binding
84870_at	42	110	5	93	-2.051	-1.037	0.00474657	RSPO3	R-spondin 3 homolog (Xenopus laevis)	84870	6	127481740	6q22.33	NA	Hs.135254	10842357, 12463421, 12477932, 12643280, 14574404, 14702039, 15489334, 16357527, 18978678, 19084217	GO:0005576: extracellular region, GO:0008201: heparin binding, GO:0016055: Wnt receptor signaling pathway, GO:0050896: response to stimulus
6428_at	1175	2023	241	215	-1.741	-0.8	0.00155962	SFRS3	splicing factor, arginine/serine-rich 3	6428	6	36670067	6p21	NA	Hs.405144	1577277, 2030943, 8208298, 9420331, 9447963, 9472028, 9647638, 10390541, 10757789, 10809782, 10823932, 11336712, 11790298, 11991645, 12226669, 12477932, 12634307, 12890497, 14559993, 14702039, 15169763, 15231747, 15324660, 15489334, 15827065, 16713569, 17028590, 17081983, 17183366, 17353931, 18945760, 18952824, 19047369	GO:0000166: nucleotide binding, GO:0000398: nuclear mRNA splicing, via spliceosome, GO:0003723: RNA binding, GO:0005515: protein binding, GO:0005634: nucleus, GO:0008380: RNA splicing
6431_at	360	559	101	114	-1.573	-0.653	0.00131021	SFRS6	splicing factor, arginine/serine-rich 6	6431	20	41519917	20q12-q13.1	NA	Hs.6891	1577277, 7556075, 7651409, 8208298, 9436904, 9472028, 9649504, 9671816, 10092085, 10340541, 10757789, 10983978, 11549316, 11780052, 12226669, 12477932, 12531473, 12549914, 12549978, 12779084, 14559993, 15302935, 15489334, 15635413, 16189514, 16341674, 17081983, 17353931, 18315555, 18571879, 19165527	GO:0000166: nucleotide binding, GO:0000398: nuclear mRNA splicing, via spliceosome, GO:0003723: RNA binding, GO:0005515: protein binding, GO:0005634: nucleus, GO:0006376: mRNA splice site selection, GO:0008380: RNA splicing
6432_at	506	989	92	30	-1.977	-0.983	0.000214619	SFRS7	splicing factor, arginine/serine-rich 7, 35kDa	6432	2	-38824246	2p22.1	NA	Hs.309090	7629084, 8013463, 8125298, 8871564, 9373149, 9685386, 11096110, 12221105, 12226669, 12477932, 12501247, 14559993, 14684736, 14702039, 15123677, 15146077, 15169763, 15184380, 15210956, 15302935, 15489334, 15907217, 17081983, 17137791, 17353931, 17513303, 19165527	GO:0000166: nucleotide binding, GO:0000398: nuclear mRNA splicing, via spliceosome, GO:0003723: RNA binding, GO:0005515: protein binding, GO:0005634: nucleus, GO:0008270: zinc ion binding, GO:0008380: RNA splicing, GO:0046872: metal ion binding
91461_at	346	557	81	263	-1.512	-0.597	0.00145476	SGK493	protein kinase-like protein SgK493	91461	2	42128664	2p21	NA	Hs.408542	8889548, 12471243, 12477932, 15489334, 16341674, 16344560
8879_at	640	1027	43	280	-1.566	-0.647	0.000832832	SGPL1	sphingosine-1-phosphate lyase 1	8879	10	72245709	10q21	NA	Hs.499984	2061324, 9464245, 10574462, 11018465, 12477932, 14570870, 14702039, 15342556, 15489334, 16777052, 17090686, 17373700, 18172856, 19119317	GO:0005783: endoplasmic reticulum, GO:0005789: endoplasmic reticulum membrane, GO:0006629: lipid metabolic process, GO:0006672: ceramide metabolic process, GO:0006915: apoptosis, GO:0008117: sphinganine-1-phosphate aldolase activity, GO:0016020: membrane, GO:0016021: integral to membrane, GO:0016829: lyase activity, GO:0016831: carboxy-lyase activity, GO:0019752: carboxylic acid metabolic process…
100033423_at	107	186	28	26	-1.778	-0.83	0.00148139	SNORD116-11	small nucleolar RNA, C/D box 116-11	100033423	15	22872167	15q11.2	NA		11106375, 11726556
100033820_at	332	642	176	133	-2.178	-1.123	0.00107392	SNORD116-28	small nucleolar RNA, C/D box 116-28	100033820	15	22900880	15q11.2	NA		11106375, 11726556
6646_at	101	218	26	43	-2.173	-1.12	0.00015592	SOAT1	sterol O-acyltransferase 1	6646	1	177529639	1q25	NA	Hs.496383	3335499, 8197480, 8407899, 9756919, 9756920, 10196189, 10438503, 10623671, 11353332, 11401500, 11483630, 12477932, 12533546, 12851640, 14729857, 15219857, 15253151, 15308631, 15319423, 15353128, 15489334, 15768051, 15850387, 15992359, 16013913, 16043284, 16154994, 16230498, 16474185, 16647063, 16763159, 17412327, 17593314, 17622762, 18269457, 18971559	GO:0000062: acyl-CoA binding, GO:0005783: endoplasmic reticulum, GO:0005789: endoplasmic reticulum membrane, GO:0005792: microsome, GO:0006629: lipid metabolic process, GO:0008202: steroid metabolic process, GO:0008203: cholesterol metabolic process, GO:0008415: acyltransferase activity, GO:0010742: foam cell differentiation, GO:0010742: foam cell differentiation, GO:0010742: foam cell differenti…	00120: Bile acid biosynthesis
219736_at	37	56	8	8	-1.548	-0.63	0.0079358	STOX1	storkhead box 1	219736	10	70257386, 70257386, 70257604	10q21.3	NA	Hs.37636	12477932, 14702039, 15164054, 15489334, 15806103, 17290274, 17617193, 19079545	GO:0003677: DNA binding, GO:0005634: nucleus, GO:0005737: cytoplasm
10431_at	418	639	118	110	-1.555	-0.637	0.00890937	TIMM23	translocase of inner mitochondrial membrane 23 homolog (yeast)	10431	10	-51262093	10q11.21-q11.23	NA	Hs.524308, Hs.661964	8125298, 9373149, 10339406, 10393182, 12437925, 12477932, 15044455, 15489334	GO:0005515: protein binding, GO:0005739: mitochondrion, GO:0005741: mitochondrial outer membrane, GO:0005744: mitochondrial inner membrane presequence translocase complex, GO:0005758: mitochondrial intermembrane space, GO:0006626: protein targeting to mitochondrion, GO:0008565: protein transporter activity, GO:0015450: P-P-bond-hydrolysis-driven protein transmembrane transporter activity, GO:0016…
51643_at	251	432	72	97	-1.741	-0.8	0.00115206	TMBIM4	transmembrane BAX inhibitor motif containing 4	51643	12	-64816983	12q14.1	NA	Hs.505934	8125298, 9373149, 10810093, 10931946, 11042152, 12477932, 15489334, 16303743, 17319741, 17353931, 18440869	GO:0005515: protein binding, GO:0016020: membrane, GO:0016021: integral to membrane
79073_at	470	743	69	135	-1.573	-0.653	0.000135651	TMEM109	transmembrane protein 109	79073	11	60437946	11q12.2	NA	Hs.13662	8619474, 9110174, 12477932, 15489334	GO:0005634: nucleus, GO:0005640: nuclear outer membrane, GO:0016020: membrane, GO:0016021: integral to membrane, GO:0033017: sarcoplasmic reticulum membrane
23670_at	483	872	84	198	-1.786	-0.837	0.00245333	TMEM2	transmembrane protein 2	23670	9	-73488101	9q13-q21	NA	Hs.494146	10718198, 10767548, 12477932, 14702039, 16344560	GO:0016020: membrane, GO:0016021: integral to membrane
401505_at	641	963	128	181	-1.505	-0.59	0.000958434	TOMM5	translocase of outer mitochondrial membrane 5 homolog (yeast)	401505	9	-37578413, -37578411	9p13.2	NA	Hs.130774	8889548, 12477932, 15164053, 15489334, 18331822	GO:0005739: mitochondrion, GO:0005742: mitochondrial outer membrane translocase complex, GO:0008565: protein transporter activity, GO:0015031: protein transport, GO:0016020: membrane, GO:0016021: integral to membrane, GO:0043681: protein import into mitochondrion
7263_at	269	405	74	27	-1.544	-0.627	0.0006157	TST	thiosulfate sulfurtransferase (rhodanese)	7263	22	-35736851	22q13.1	NA	Hs.474783	986188, 1451437, 1953758, 2006499, 2817794, 3471602, 3479705, 6402020, 6588145, 8125298, 8340386, 9070219, 9373149, 10591208, 11112515, 11788560, 12477932, 12665801, 12962704, 14702039, 15461802, 15489334, 15910006, 17035239, 18029348	GO:0004792: thiosulfate sulfurtransferase activity, GO:0005739: mitochondrion, GO:0005759: mitochondrial matrix, GO:0005856: cytoskeleton, GO:0005886: plasma membrane, GO:0008272: sulfate transport, GO:0009440: cyanate catabolic process, GO:0016740: transferase activity
10269_at	413	724	110	213	-1.745	-0.803	0.00720656	ZMPSTE24	zinc metallopeptidase (STE24 homolog, S. cerevisiae)	10269	1	40496319	1p34	NA	Hs.132642, Hs.591501	9700155, 10076063, 10373325, 12477932, 12913070, 14702039, 15317753, 15489334, 15671064, 15843403, 16297189, 16303743, 16344560, 16710414, 17152860, 17352743, 18029348, 18230615, 18435794	GO:0000139: Golgi membrane, GO:0004222: metalloendopeptidase activity, GO:0005737: cytoplasm, GO:0005783: endoplasmic reticulum, GO:0005789: endoplasmic reticulum membrane, GO:0005794: Golgi apparatus, GO:0006508: proteolysis, GO:0008233: peptidase activity, GO:0008235: metalloexopeptidase activity, GO:0008270: zinc ion binding, GO:0016020: membrane, GO:0016021: integral to membrane, GO:0046872: …
7699_at	79	122	12	27	-1.523	-0.607	0.00296343	ZNF140	zinc finger protein 140	7699	12	132167109	12q24.32-q24.33	NA	Hs.181552	7557990, 7649249, 12477932, 14702039	GO:0003700: transcription factor activity, GO:0005622: intracellular, GO:0005634: nucleus, GO:0006350: transcription, GO:0006355: regulation of transcription, DNA-dependent, GO:0008270: zinc ion binding, GO:0046872: metal ion binding
7580_at	101	154	25	42	-1.519	-0.603	0.00975093	ZNF32	zinc finger protein 32	7580	10	-43459312, -43459312	10q22-q25	NA	Hs.522885	1946370, 2288909, 8500793, 9475118, 12477932, 15164054, 15489334, 17474147	GO:0003677: DNA binding, GO:0005515: protein binding, GO:0005622: intracellular, GO:0005634: nucleus, GO:0006350: transcription, GO:0006355: regulation of transcription, DNA-dependent, GO:0008270: zinc ion binding, GO:0046872: metal ion binding
55786_at	86	143	26	14	-1.713	-0.777	0.00904522	ZNF415	zinc finger protein 415	55786	19	-58303165, -58302943	19q13.41	NA	Hs.147765	8619474, 9110174, 12477932, 14702039, 17055453	GO:0003677: DNA binding, GO:0005622: intracellular, GO:0005634: nucleus, GO:0005737: cytoplasm, GO:0006350: transcription, GO:0006355: regulation of transcription, DNA-dependent, GO:0008270: zinc ion binding, GO:0046872: metal ion binding
7596_at	57	97	13	20	-1.709	-0.773	0.00129552	ZNF45	zinc finger protein 45	7596	19	-49108620	19q13.2	NA	Hs.381285	1559709, 2288909, 9067431, 9570955, 12477932, 15057824, 15489334	GO:0003700: transcription factor activity, GO:0005622: intracellular, GO:0005634: nucleus, GO:0006350: transcription, GO:0006355: regulation of transcription, DNA-dependent, GO:0007275: multicellular organismal development, GO:0008270: zinc ion binding, GO:0046872: metal ion binding
84924_at	126	226	44	57	-1.828	-0.87	0.00232495	ZNF566	zinc finger protein 566	84924	19	-41627861, -41627861	19q13.12	NA	Hs.646371	12477932, 14702039, 15342556, 15489334	GO:0003677: DNA binding, GO:0005622: intracellular, GO:0005634: nucleus, GO:0006350: transcription, GO:0006355: regulation of transcription, DNA-dependent, GO:0008270: zinc ion binding, GO:0046872: metal ion binding
84775_at	110	178	25	31	-1.628	-0.703	0.00753474	ZNF607	zinc finger protein 607	84775	19	-42879115	19q13.1	NA	Hs.116622	12477932, 14702039, 15489334, 16189514	GO:0003677: DNA binding, GO:0005622: intracellular, GO:0005634: nucleus, GO:0006350: transcription, GO:0006355: regulation of transcription, DNA-dependent, GO:0008270: zinc ion binding, GO:0046872: metal ion binding
